# Supplementary material for: Phenothiazine and phenothiazine-5,5-dioxide-based push–pull derivatives: synthesis, photophysical, electrochemical and computational studies
Source: Royal Society of Chemistry journal article supplement (doi:10.1039/d2nj03089f), 2022-01-01
Supplement: d2nj03089f1.pdf [file d2nj03089f1.pdf]

**Phenothiazine and phenothiazine-5,5dioxide-based push-pull derivatives:  
Synthesis, photophysical, electrochemical and computational studies**

Indresh Singh Yadav, Rajneesh Misra\*

Department of Chemistry, Indian Institute of Technology Indore

Indore 453552, India

Email: [rajneeshmisra@iiti.ac.in](mailto:rajneeshmisra@iiti.ac.in)

**Supporting Information**

|                                                                                 |                |
|---------------------------------------------------------------------------------|----------------|
| <b>Experimental Section.....</b>                                                | <b>S2</b>      |
| <b><sup>1</sup>H NMR, <sup>13</sup>C NMR, HMBC NMR and HRMS of PTZ 1–6.....</b> | <b>S3–S16</b>  |
| <b>UV-vis spectra of PTZ 1–6.....</b>                                           | <b>S17</b>     |
| <b>CV and DPV plots of PTZ 1–6.....</b>                                         | <b>S18–S20</b> |
| <b>DFT and TD-DFT data of PTZ 1–6.....</b>                                      | <b>S21–S53</b> |

## Experimental Section:

### General methods

All the chemicals were used as received unless otherwise indicated. All oxygen or moisture-sensitive reactions were performed under an inert atmosphere. All the chemicals were purchased from commercial sources and used without further purification.  $^1\text{H}$  NMR (400 MHz),  $^{13}\text{C}$  NMR (100 MHz and 126 MHz), and HMBC NMR spectra were recorded on the Bruker Avance (III) 400 MHz or 500 MHz, using  $\text{CDCl}_3$  as a solvent, and the chemical shifts were reported in parts per million (ppm) with TMS (0 ppm) and  $\text{CDCl}_3$  (77.00 ppm) as standards. Tetramethylsilane (TMS) was used as reference for recording  $^1\text{H}$  (of residual proton;  $\delta = 7.26$  ppm) and  $^{13}\text{C}$  (of residual proton;  $\delta = 77.0$  ppm) spectra in  $\text{CDCl}_3$ . High-Resolution Mass Spectrometry (HRMS) was recorded on a Bruker-Daltonics micrOTOF-Q II mass spectrometer. Thermogravimetric analysis was performed on the Mettler Toledo thermal analysis system. UV-visible absorption spectra of all compounds in Dichloromethane were recorded on a Carry-100 Bio UV-visible Spectrophotometer. Cyclic voltammograms (CVs) were recorded on a PalmSens 4 electrochemical analyzer using Glassy carbon as a working electrode, Pt wire as the counter electrode, and Ag/AgCl as the reference electrode. The scan rate was  $100 \text{ mV s}^{-1}$  for cyclic voltammetry. A solution of tetrabutylammonium hexafluorophosphate ( $\text{Bu}_4\text{NPF}_6$ ) in  $\text{CH}_2\text{Cl}_2$  (0.1 M) was used as the supporting electrolyte.

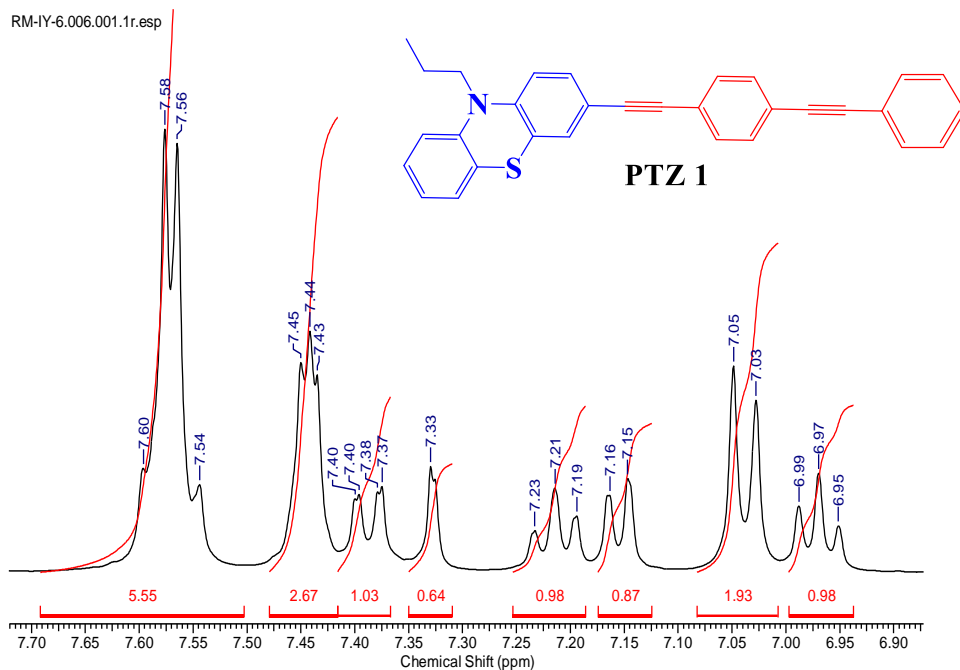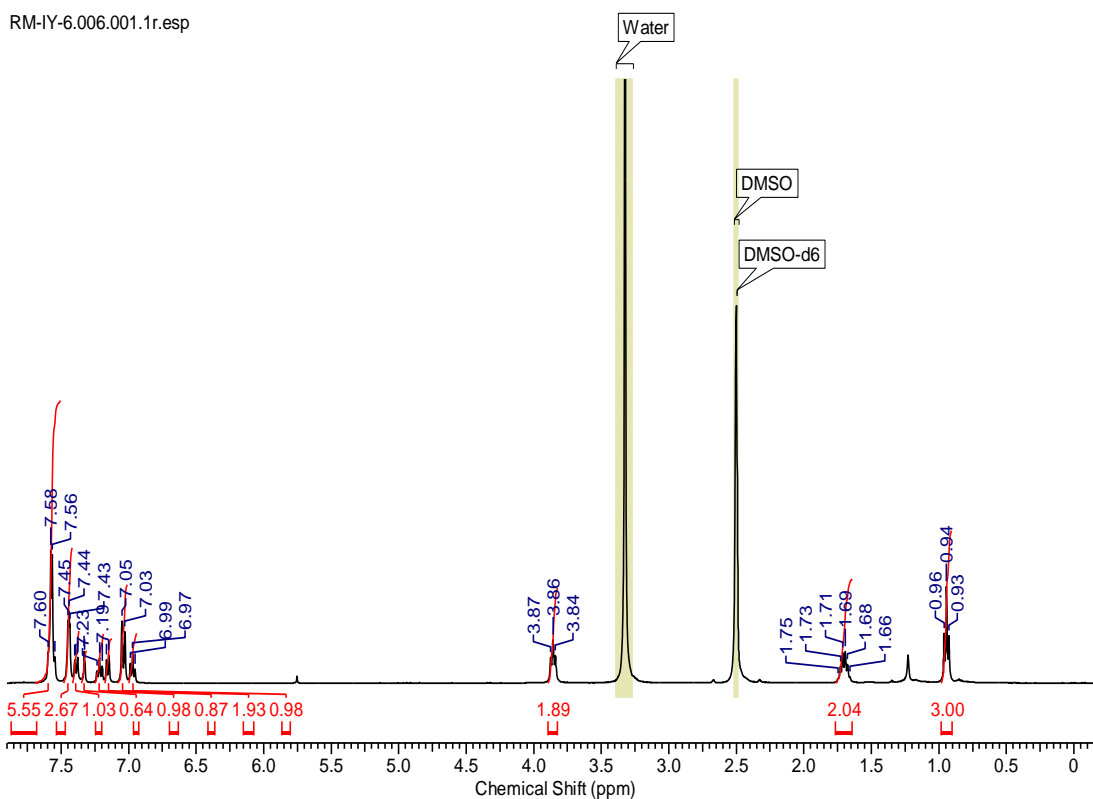

**Figure S1.**  $^1\text{H}$  NMR spectrum of **PTZ 1**.

RM-IY-6.001.001.1r.esp

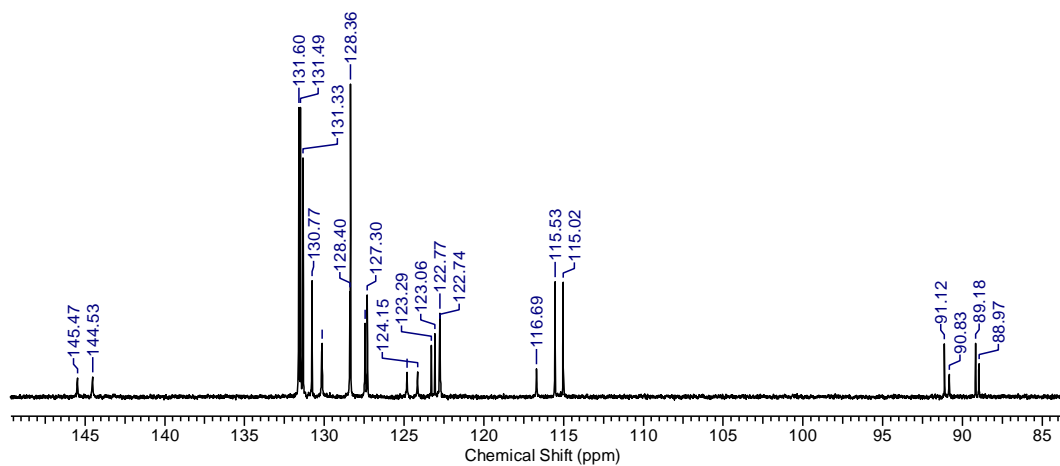

RM-IY-6.001.001.1r.esp

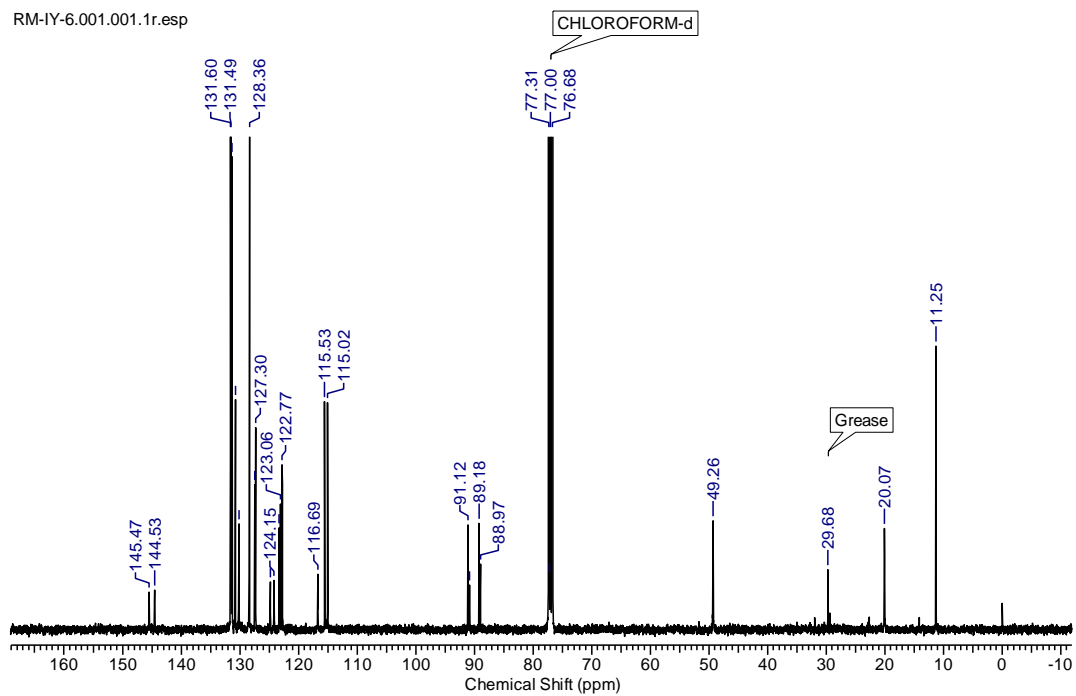

Figure S2.  $^{13}\text{C}$  NMR spectrum of PTZ 1.

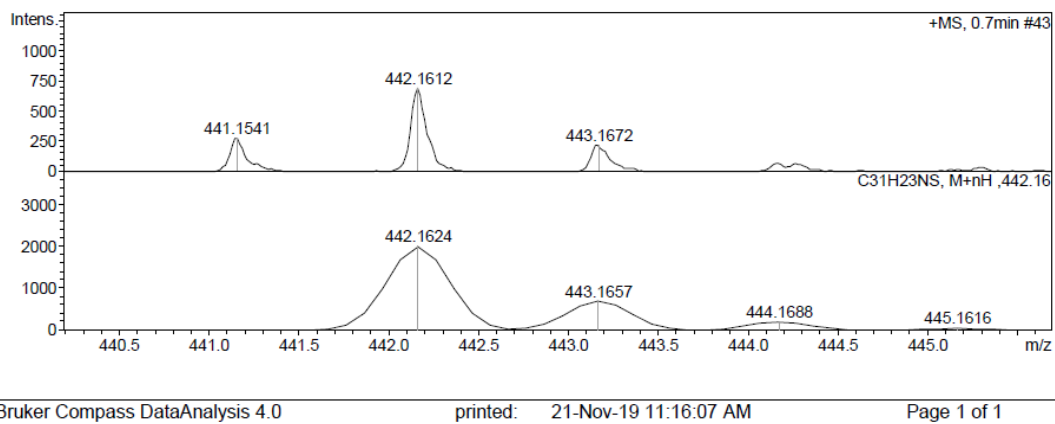

**Figure S3.** HRMS spectrum of **PTZ 1**.

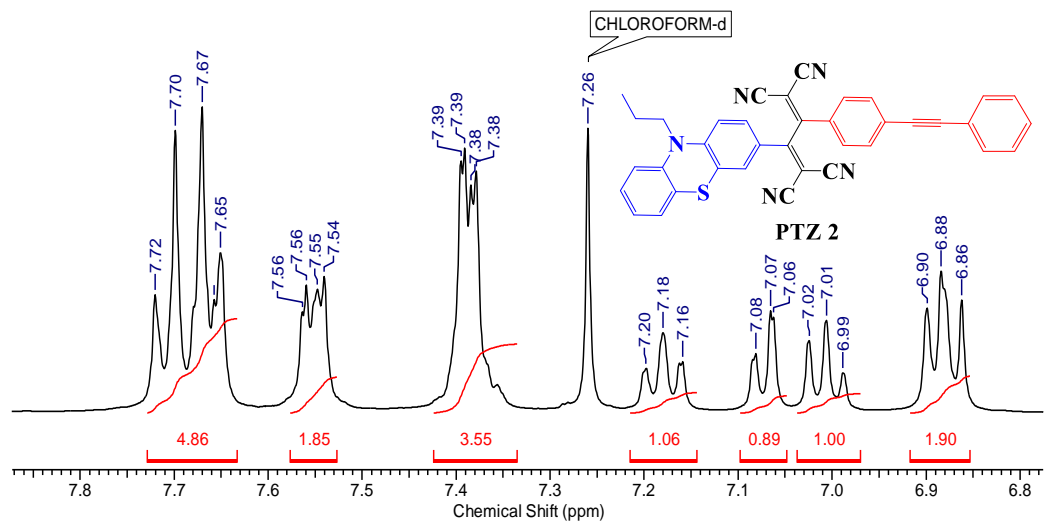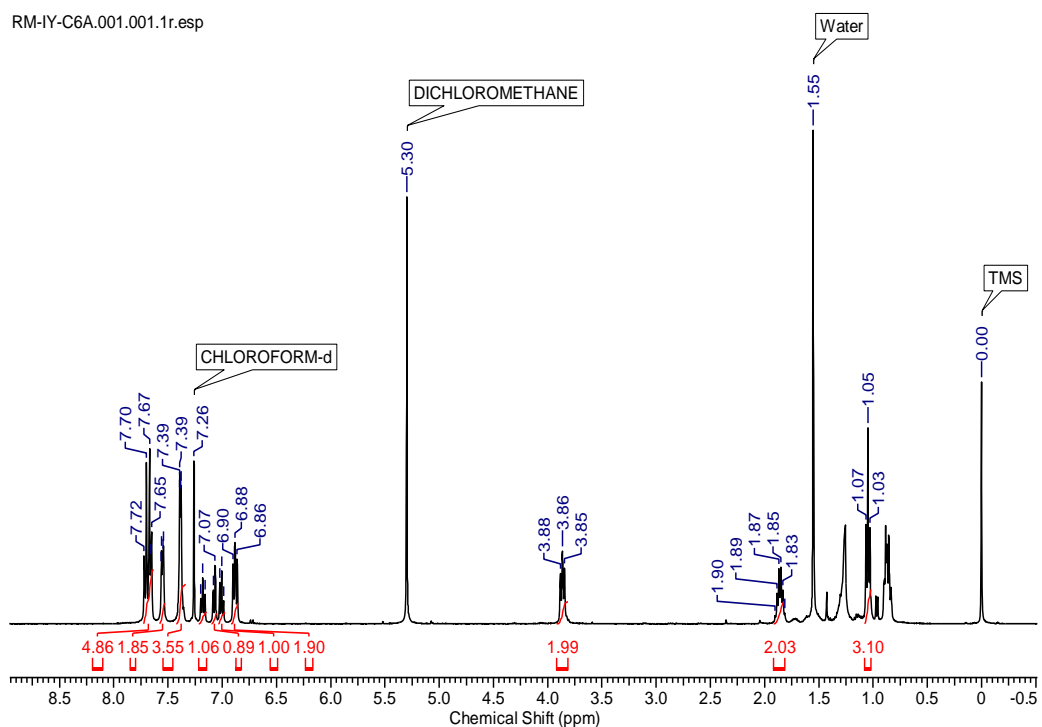

Figure S4.  $^1\text{H}$  NMR spectrum of PTZ 2.

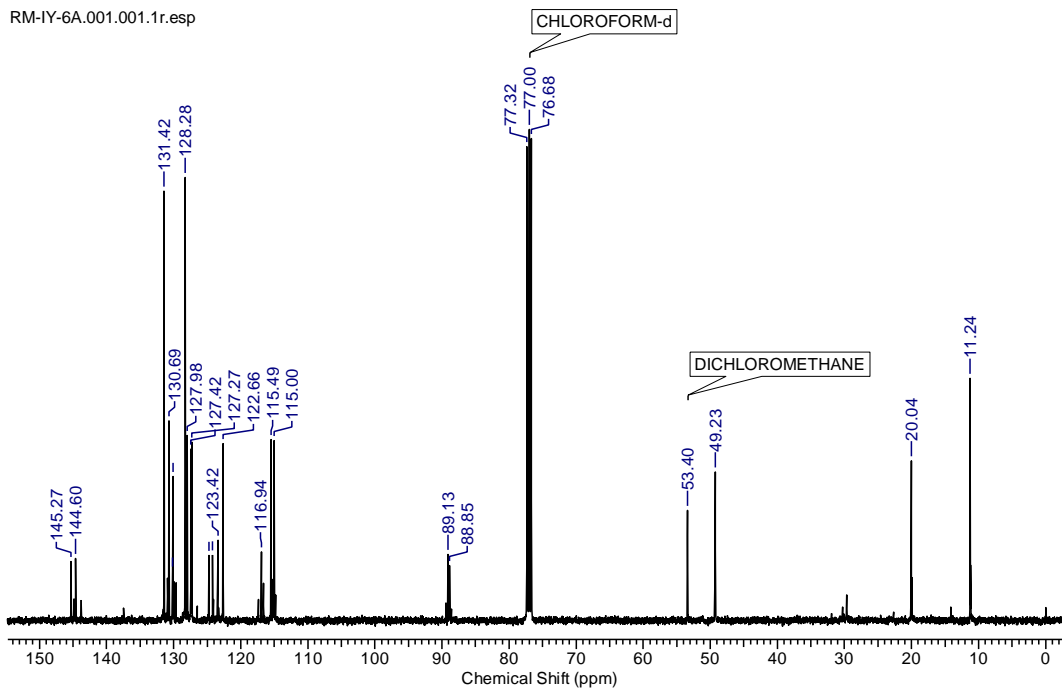

Figure S5.  $^{13}\text{C}$  NMR spectrum of PTZ 2.

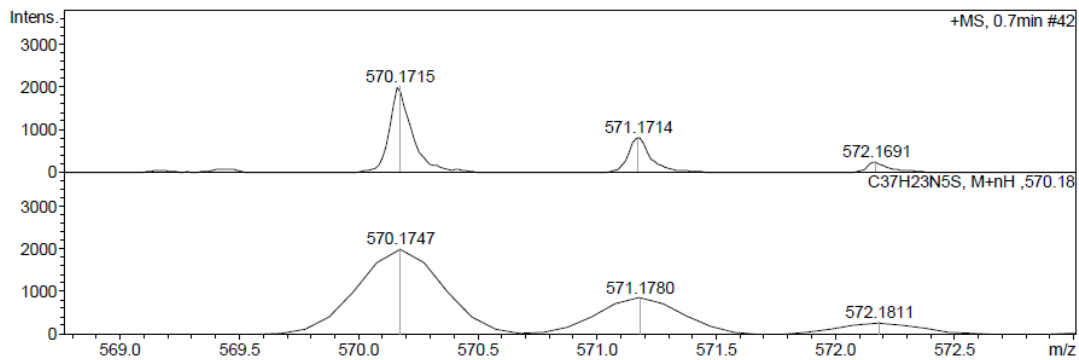

Figure S6. HRMS spectrum of PTZ 2.

RM-IY-C6B.001.001.1r.esp

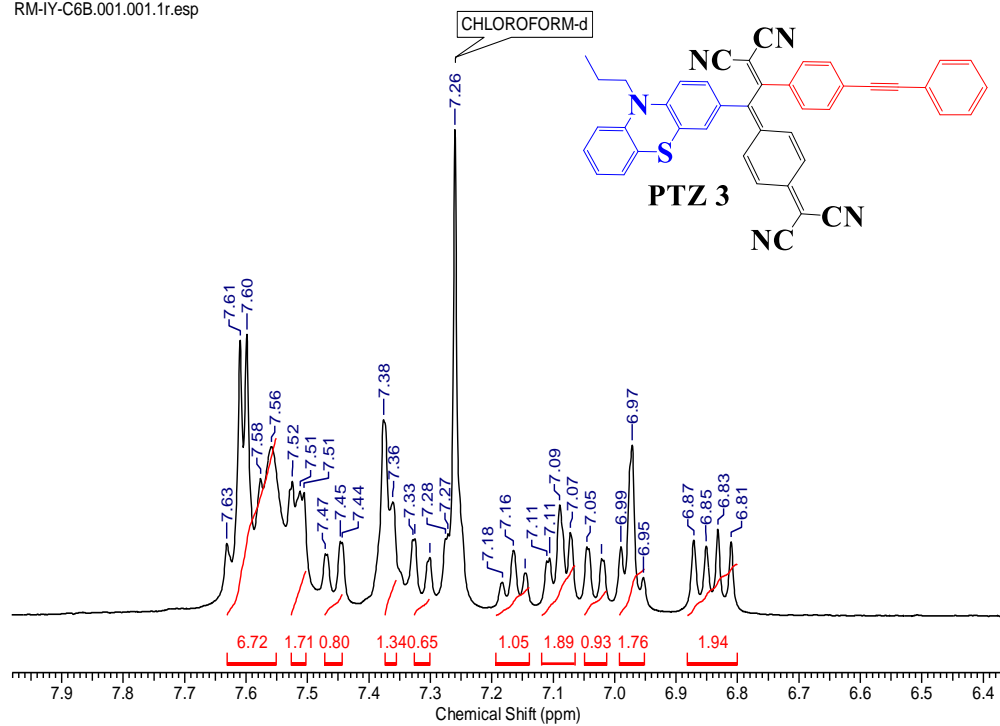

RM-IY-C6B.001.001.1r.esp

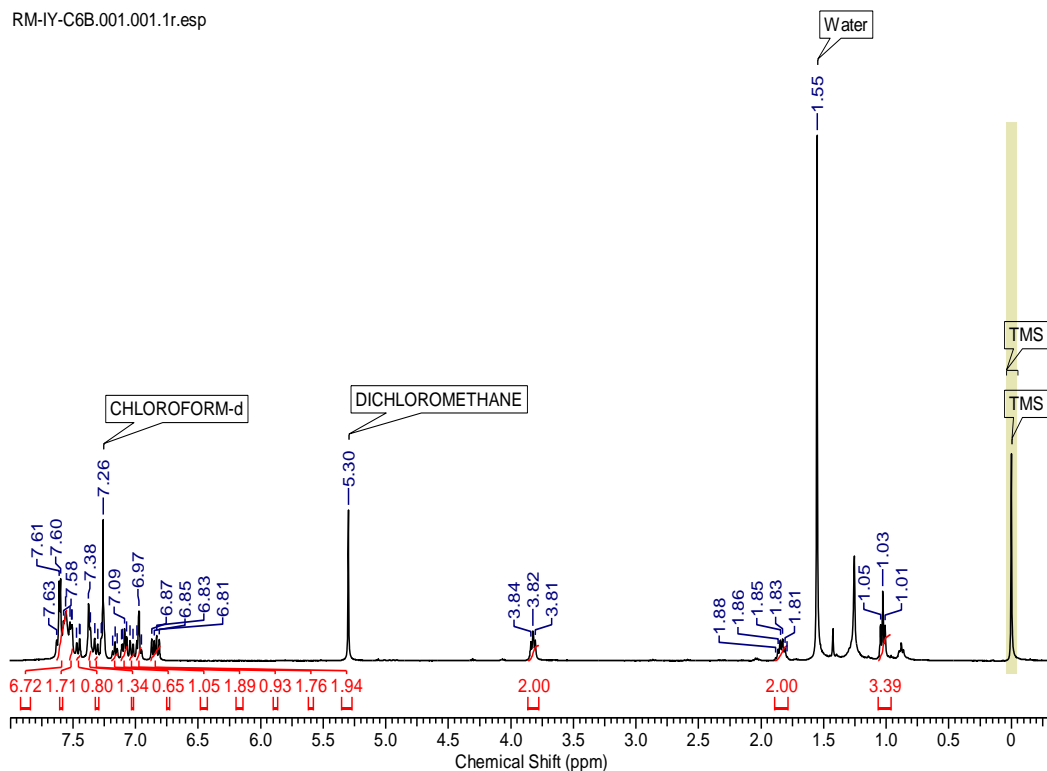

Figure S7.  $^1\text{H}$  NMR spectrum of PTZ 3.



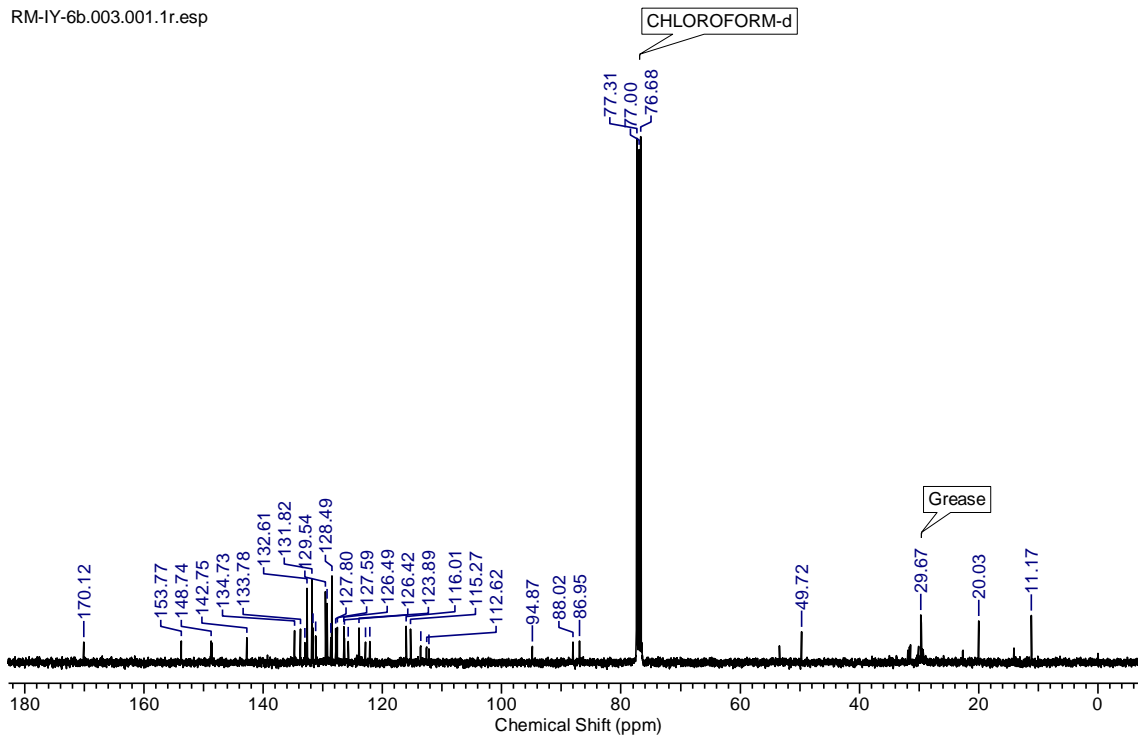

**Figure S8.**  $^{13}\text{C}$  NMR spectrum of **PTZ 3**.

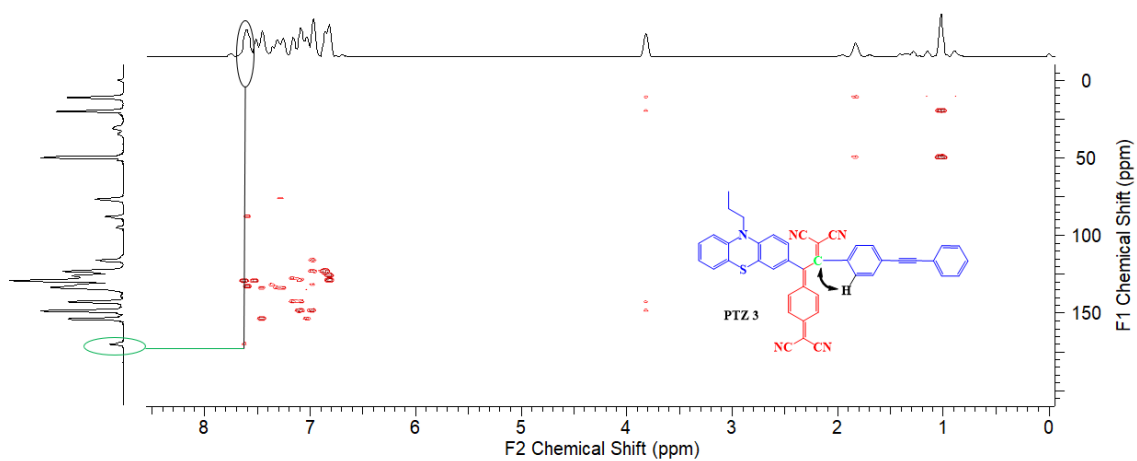

**Figure S9.** HMBC spectrum of **PTZ 3** in CDCl<sub>3</sub> solution.

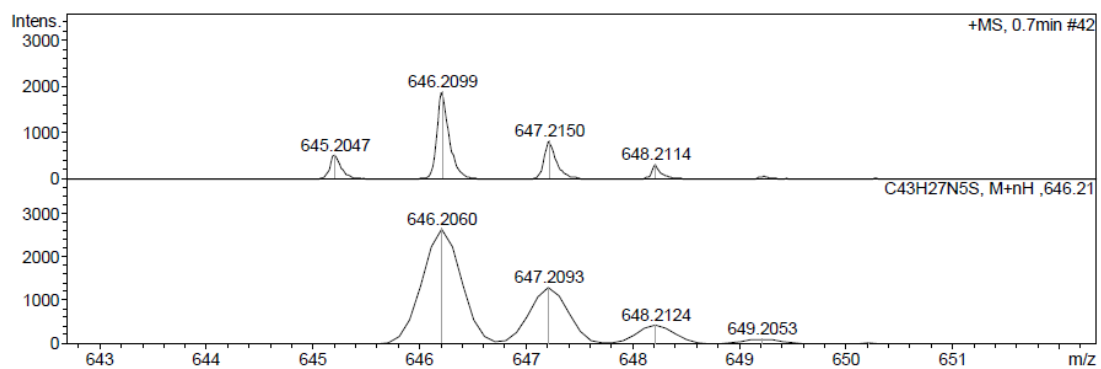

**Figure S10.** HRMS spectrum of **PTZ 3**.

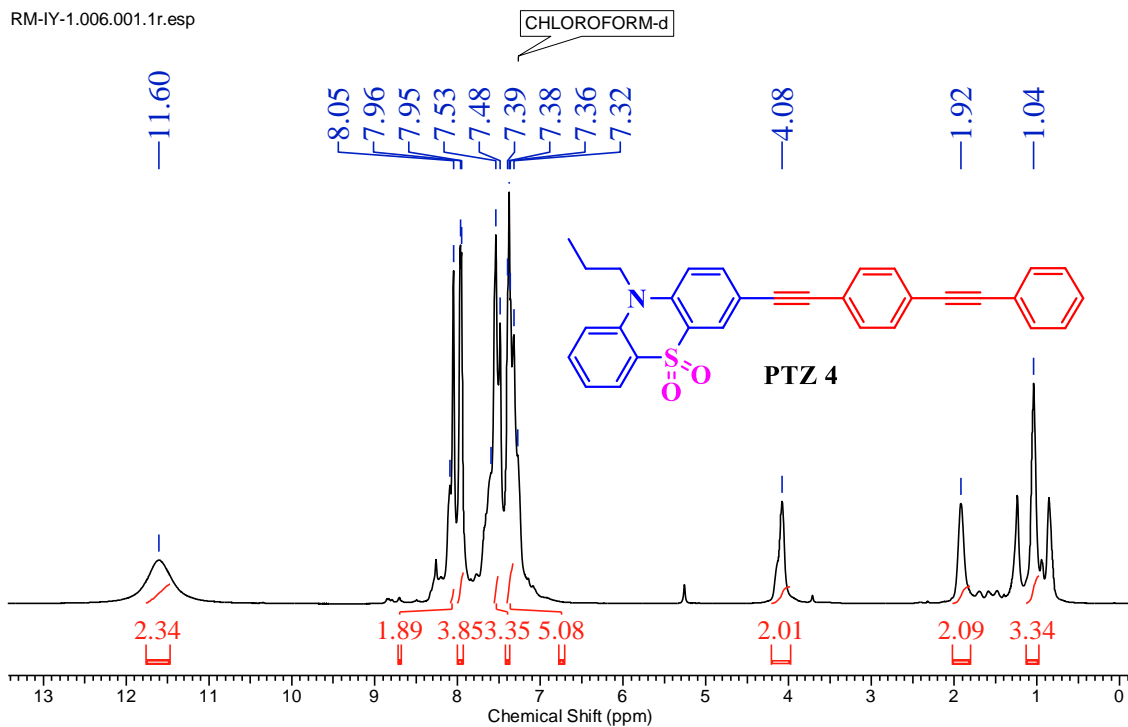

**Figure S11.**  $^1\text{H}$  NMR spectrum of **PTZ 4**.

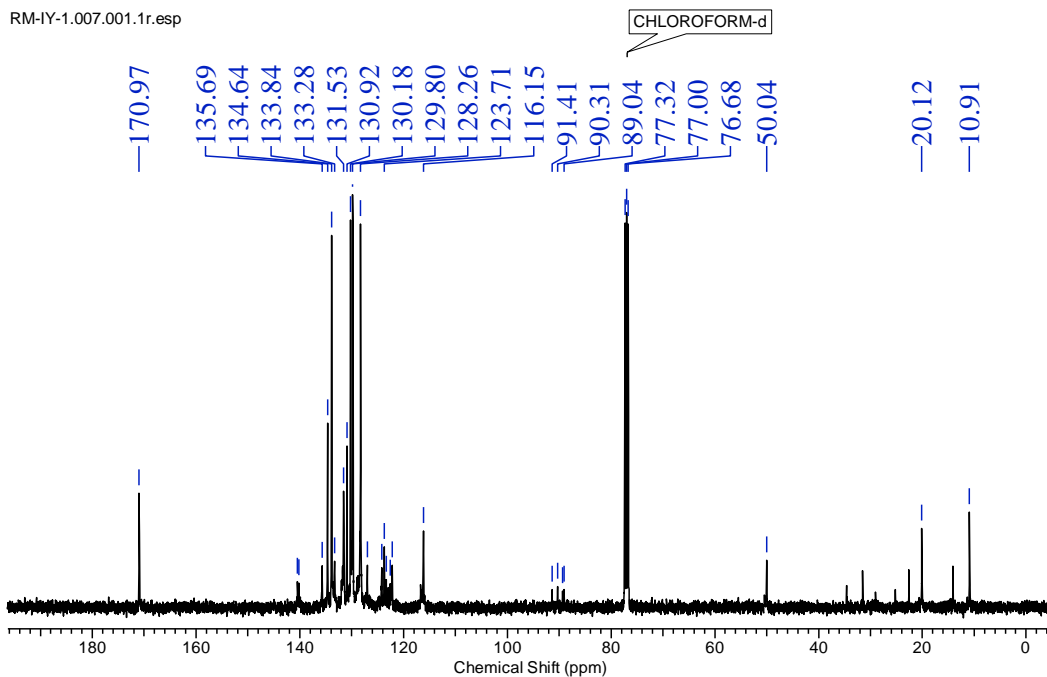

**Figure S12.**  $^{13}\text{C}$  NMR spectrum of **PTZ 4**.

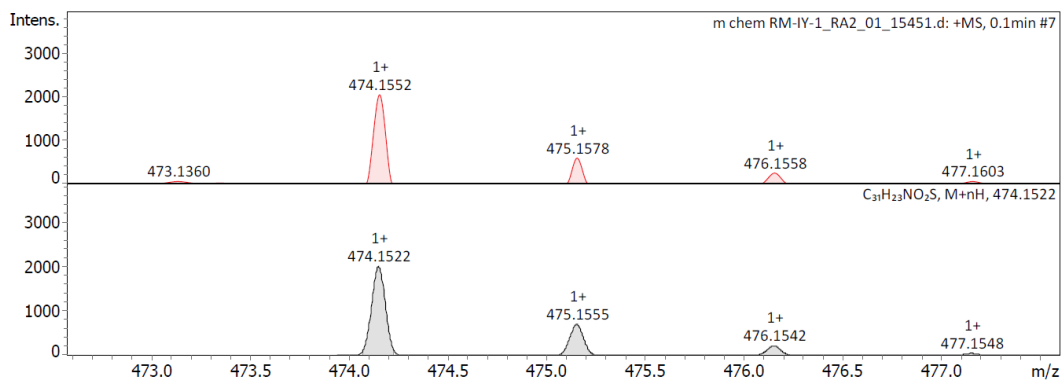

**Figure S13.** HRMS spectrum of **PTZ 4**.

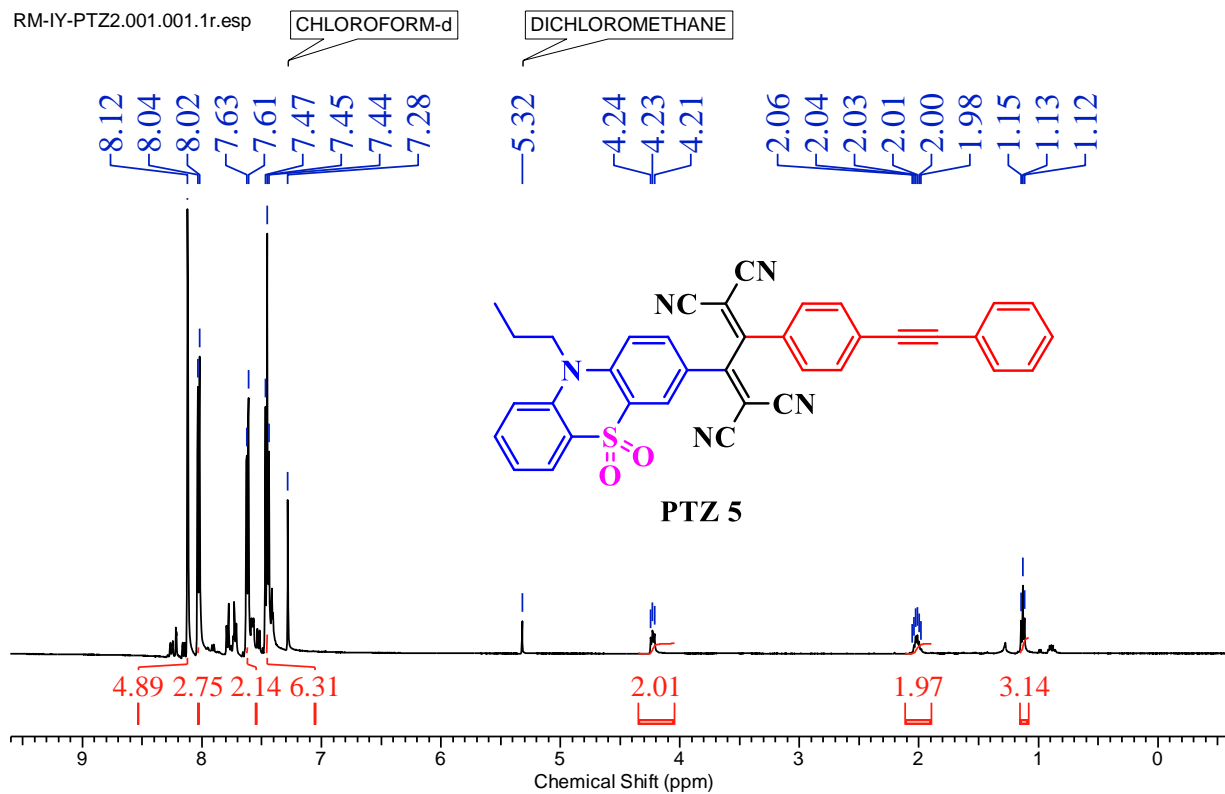

Figure S14.  $^1\text{H}$  NMR spectrum of **PTZ 5**.

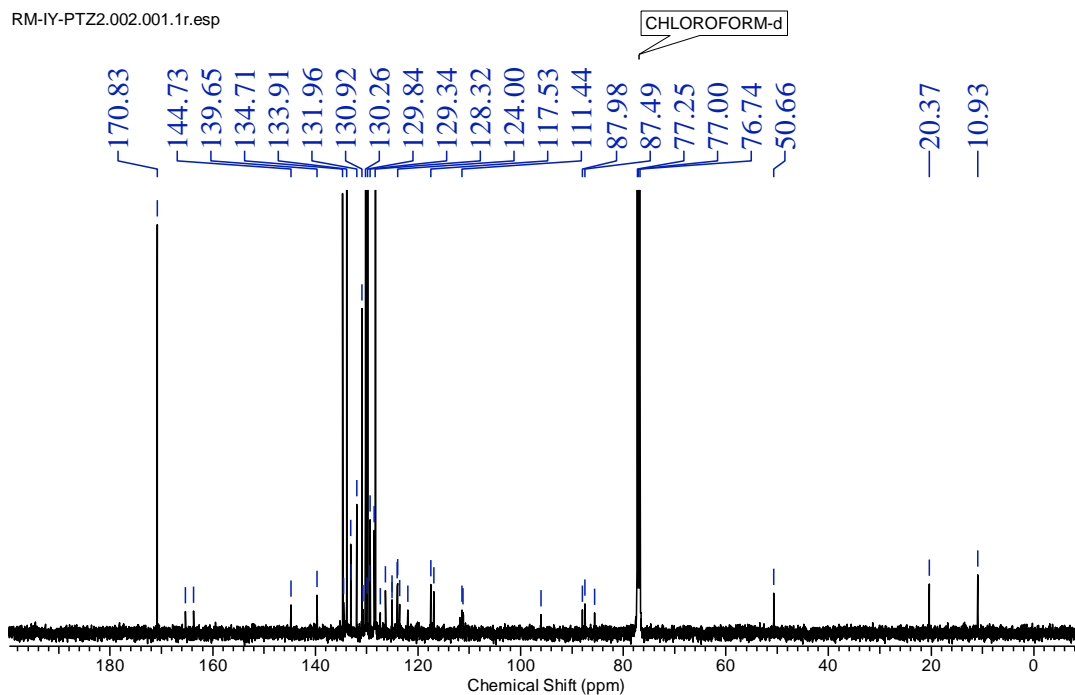

**Figure S15.**  $^{13}\text{C}$  NMR spectrum of **PTZ 5**.

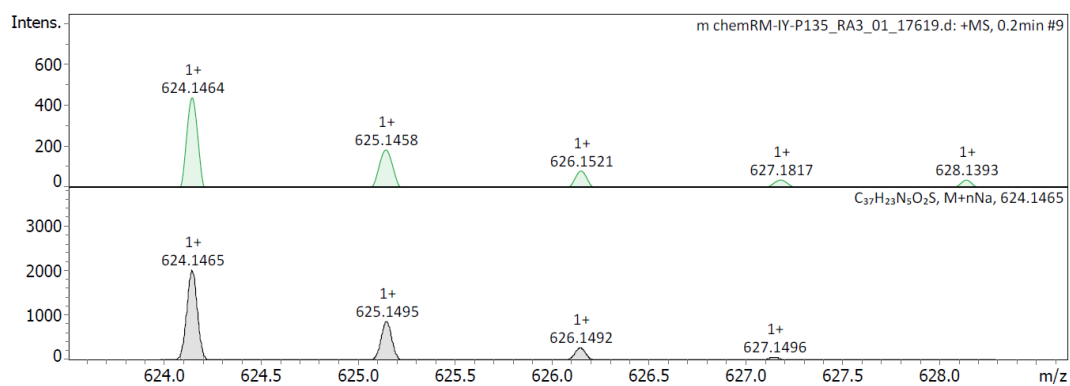

**Figure S16.** HRMS spectrum of **PTZ 5**.

RM-IY-3.006.001.1r.esp

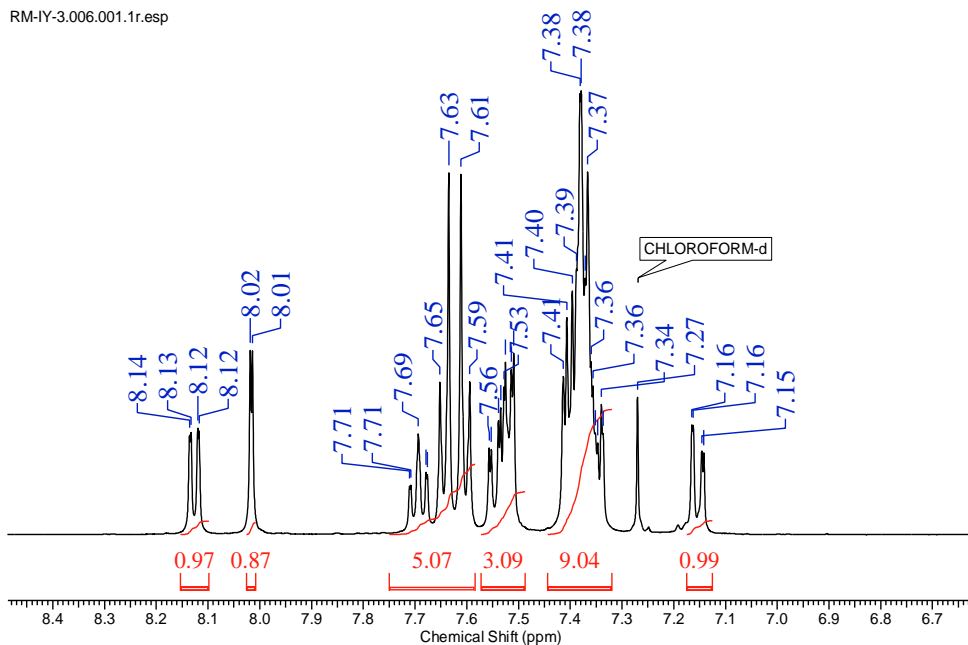

RM-IY-3.006.001.1r.esp

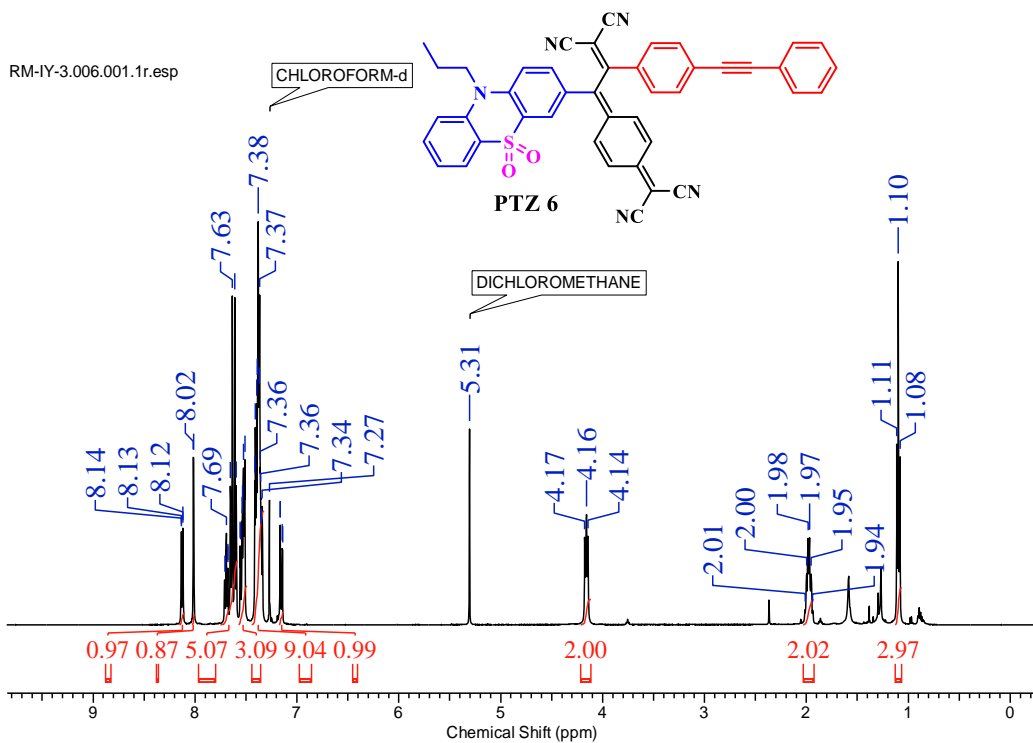

Figure S17.  $^1\text{H}$  NMR spectrum of PTZ 6.

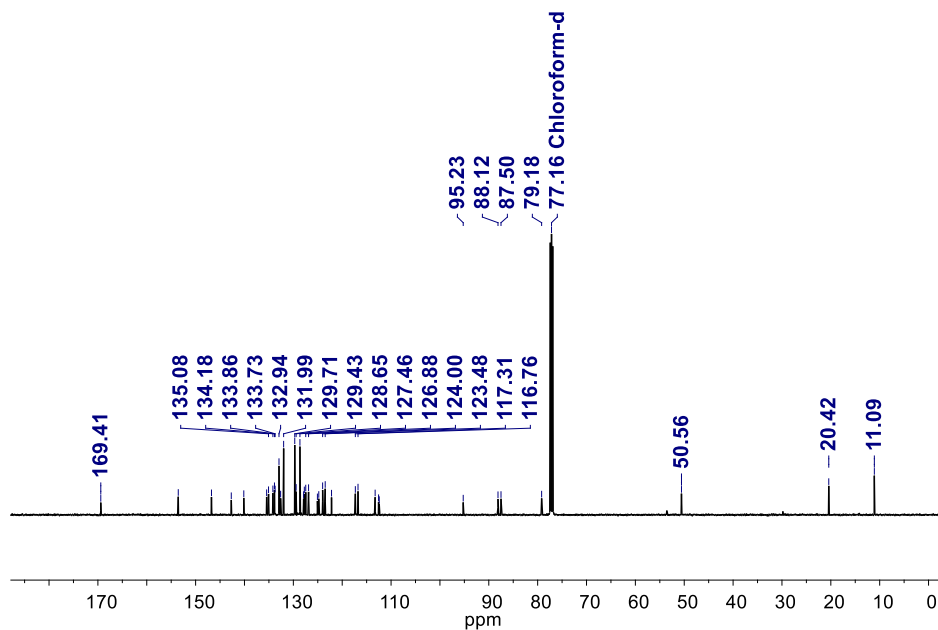

**Figure S18.** <sup>13</sup>C NMR spectrum of **PTZ 6**.

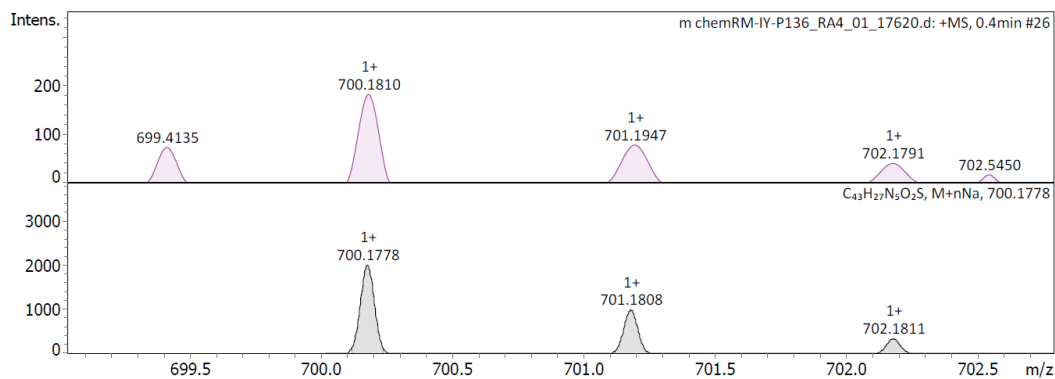

**Figure S19.** HRMS spectrum of **PTZ 6**.



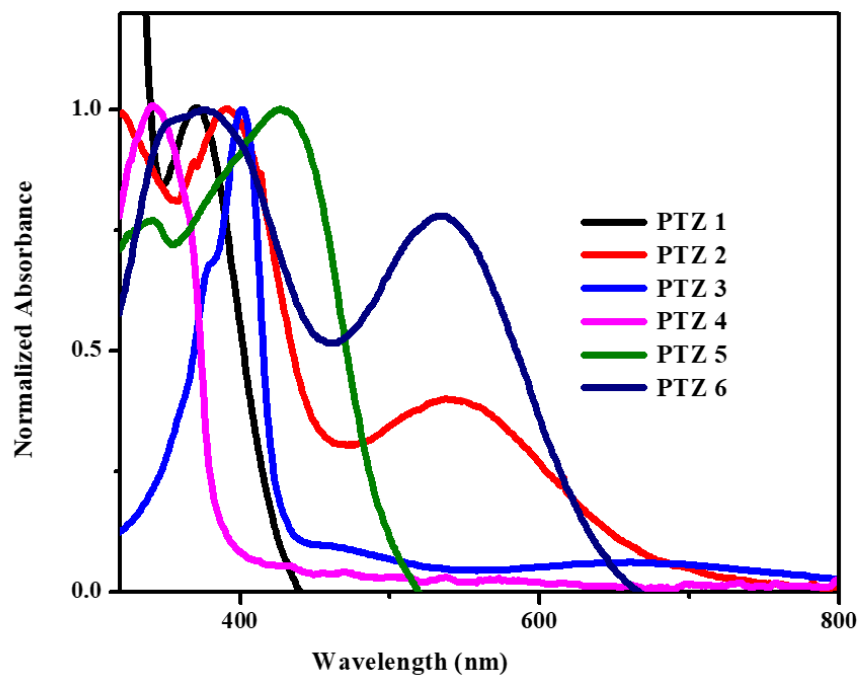

**Figure S20.** Normalized absorption spectra of push-pull **PTZ 1–6** in dry DCM ( $1 \times 10^{-5}$  M)

## Cyclic Voltammetry:

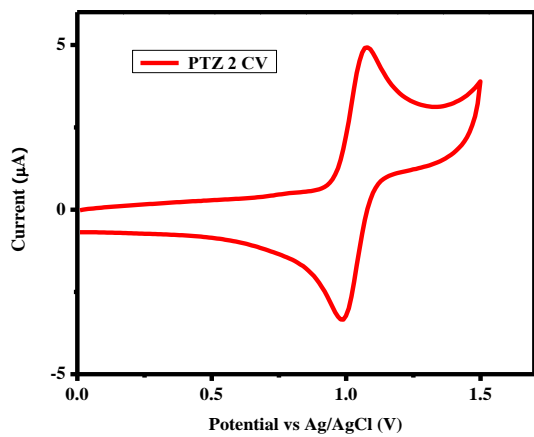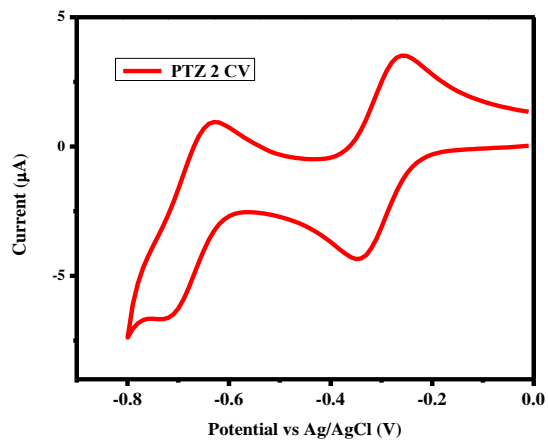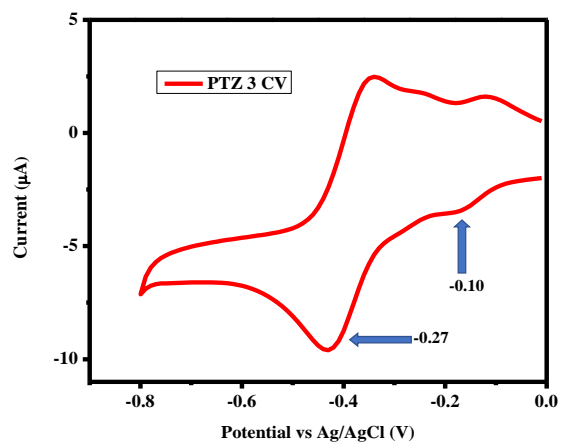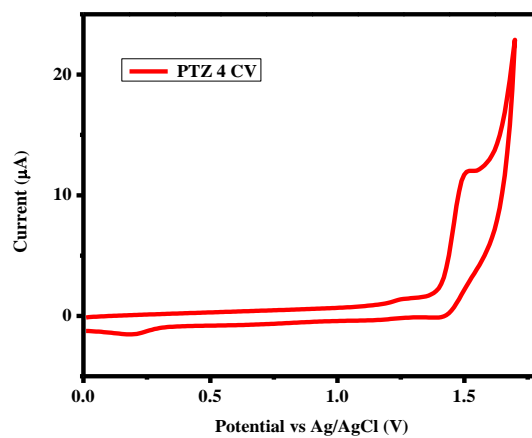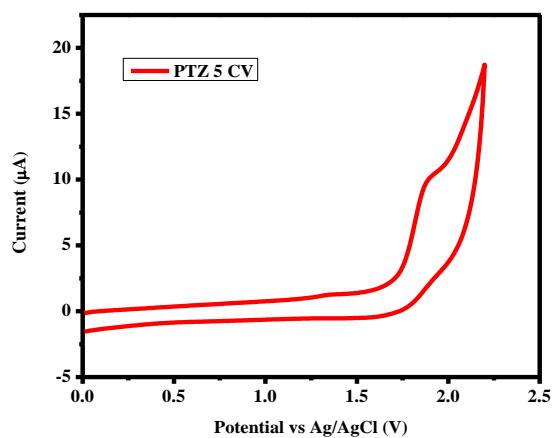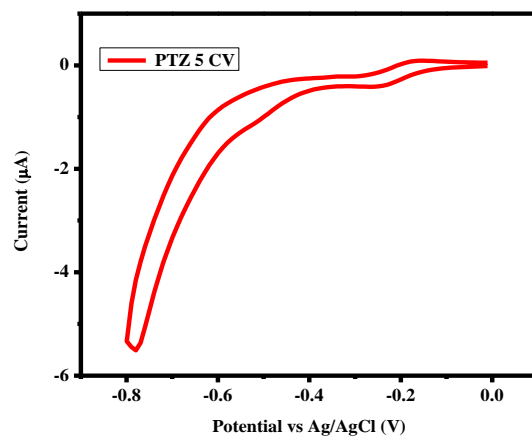

## Differential Pulse Voltammetry:

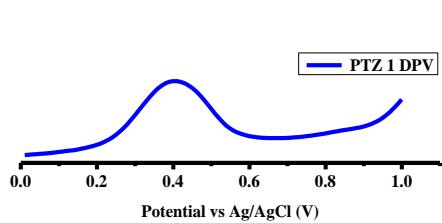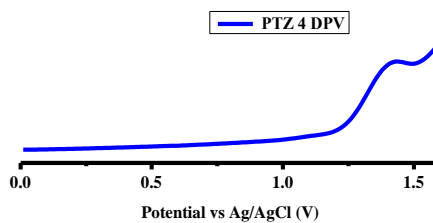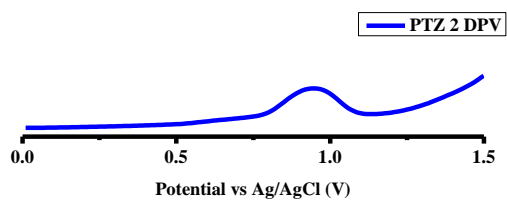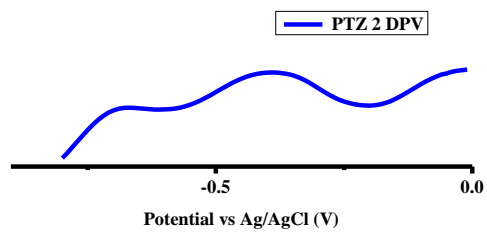

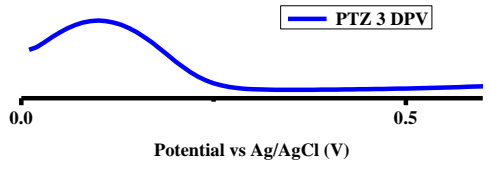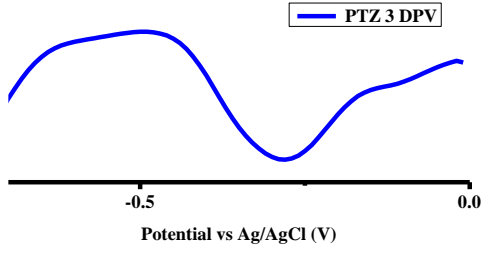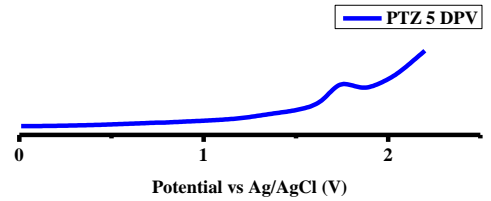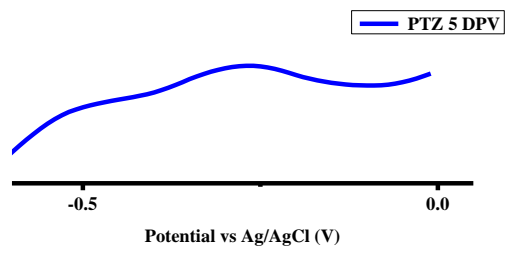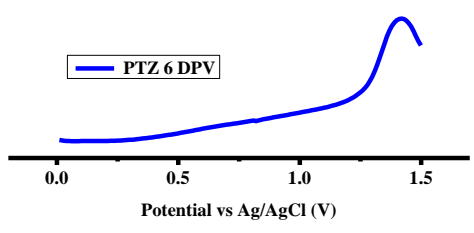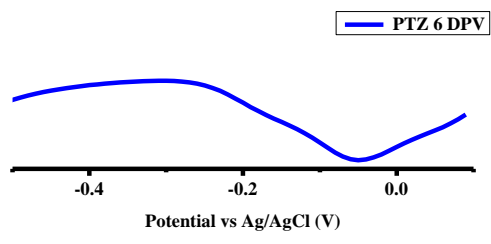

**Table S1.** The molecular orbital diagram of push-pull PTZ 1–6.

|        | PTZ 1 | PTZ 2 | PTZ 3 | PTZ 4 | PTZ 5 | PTZ 6 |
|--------|-------|-------|-------|-------|-------|-------|
| LUMO+2 |       |       |       |       |       |       |
| LUMO+1 |       |       |       |       |       |       |
| LUMO   |       |       |       |       |       |       |
| HOMO   |       |       |       |       |       |       |
| HOMO-1 |       |       |       |       |       |       |
| HOMO-2 |       |       |       |       |       |       |

**Table S2.** Calculated electronic transitions of push-pull **PTZ 1–6**.

| Compounds    | Wavelength (nm) | Composition          | $f^a$ | Assignment  |
|--------------|-----------------|----------------------|-------|-------------|
| <b>PTZ 1</b> | 425             | HOMO→LUMO (0.69)     | 1.32  | $\pi-\pi^*$ |
| <b>PTZ 2</b> | 398             | HOMO-1→LUMO+1 (0.67) | 0.60  | $\pi-\pi^*$ |
|              | 484             | HOMO-1→LUMO (0.67)   | 0.25  | ICT         |
| <b>PTZ 3</b> | 392             | HOMO-2→LUMO+1 (0.63) | 0.84  | $\pi-\pi^*$ |
|              | 773             | HOMO→LUMO (0.67)     | 0.22  | ICT         |
| <b>PTZ 4</b> | 398             | HOMO→LUMO (0.70)     | 2.38  | $\pi-\pi^*$ |
| <b>PTZ 5</b> | 389             | HOMO-1→LUMO (0.59)   | 0.54  | $\pi-\pi^*$ |
|              | 403             | HOMO→LUMO (0.60)     | 0.92  | ICT         |
| <b>PTZ 6</b> | 404             | HOMO-1→LUMO+1 (0.61) | 0.91  | $\pi-\pi^*$ |
|              | 591             | HOMO→LUMO (0.60)     | 0.43  | ICT         |

$f^a$  oscillator strength

**Experimental (bottom) and TD-DFT predicted (top) UV-Vis absorption spectra of PTZ 1–5.**

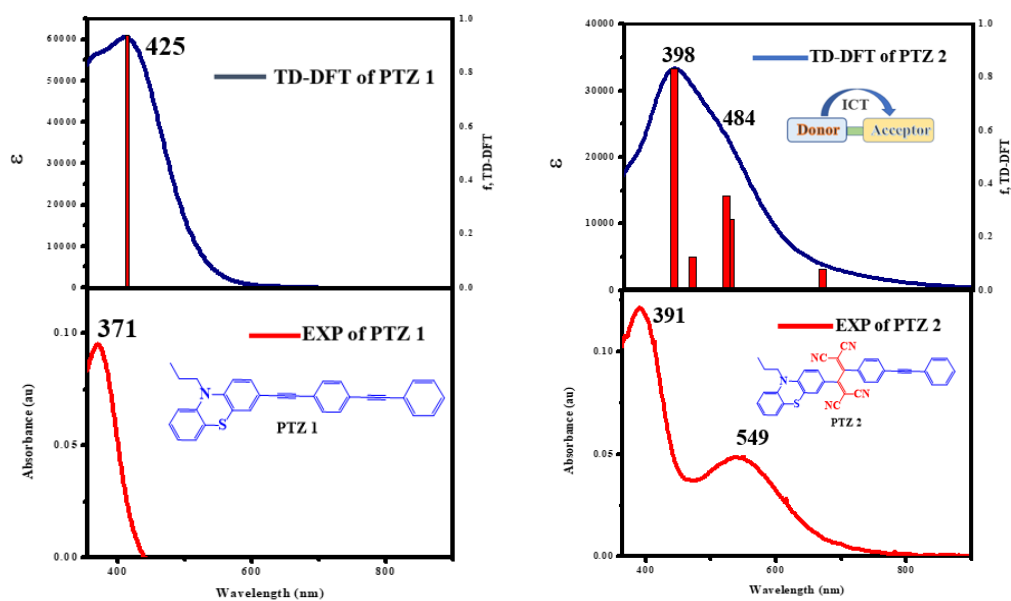

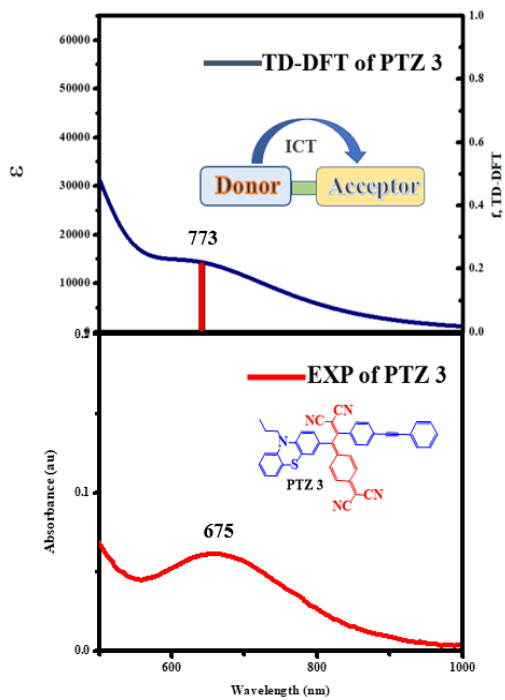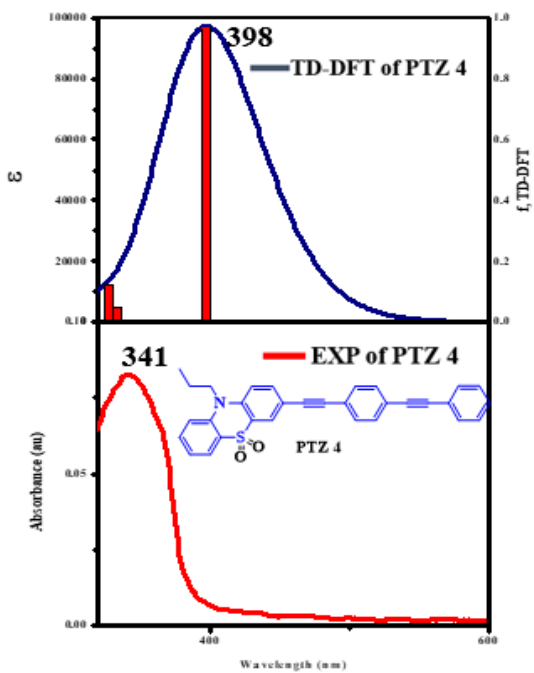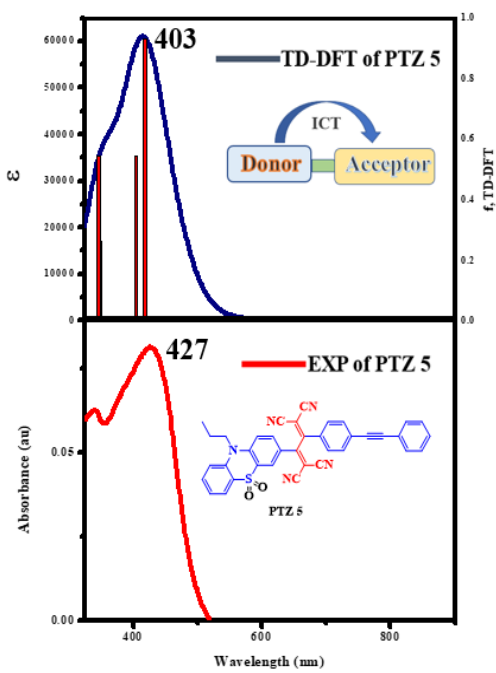

## DFT Calculation data

Calculation method: B3LYP/6-31G(d,p) for C, H, N, S and O with Gaussian 09.

### PTZ 1.

Standard orientation:

```
-----
```

| Center | Atomic | Atomic | Coordinates (Angstroms) |           |           |
|--------|--------|--------|-------------------------|-----------|-----------|
| Number | Number | Type   | X                       | Y         | Z         |
| 1      | 6      | 0      | 1.598041                | 0.425783  | -0.058875 |
| 2      | 6      | 0      | 2.375914                | -0.622236 | 0.473711  |
| 3      | 6      | 0      | 3.762715                | -0.539694 | 0.493249  |
| 4      | 6      | 0      | 4.433640                | 0.572176  | -0.058045 |
| 5      | 6      | 0      | 3.655330                | 1.600951  | -0.614862 |
| 6      | 6      | 0      | 2.267000                | 1.538461  | -0.601505 |
| 7      | 6      | 0      | 6.553183                | -0.575697 | -0.354456 |
| 8      | 6      | 0      | 6.118810                | -1.801940 | 0.185178  |
| 9      | 6      | 0      | 6.795060                | -2.987583 | -0.101881 |
| 10     | 1      | 0      | 6.429040                | -3.919508 | 0.318016  |
| 11     | 6      | 0      | 7.936035                | -2.971942 | -0.904686 |
| 12     | 6      | 0      | 8.367789                | -1.766247 | -1.453536 |
| 13     | 6      | 0      | 7.672474                | -0.583089 | -1.200778 |
| 14     | 1      | 0      | 1.884528                | -1.495471 | 0.889019  |
| 15     | 1      | 0      | 4.137202                | 2.461298  | -1.064152 |
| 16     | 1      | 0      | 1.687411                | 2.349907  | -1.028439 |
| 17     | 1      | 0      | 8.470521                | -3.894497 | -1.107152 |

```
-----
```



|    |    |   |            |           |           |
|----|----|---|------------|-----------|-----------|
| 18 | 1  | 0 | 9.239770   | -1.740577 | -2.100068 |
| 19 | 1  | 0 | 8.001073   | 0.335145  | -1.673966 |
| 20 | 6  | 0 | 0.178195   | 0.352955  | -0.052659 |
| 21 | 6  | 0 | -9.341805  | -0.140026 | -0.046944 |
| 22 | 6  | 0 | -10.114305 | 0.933343  | -0.535375 |
| 23 | 6  | 0 | -10.002128 | -1.286487 | 0.439881  |
| 24 | 6  | 0 | -11.503870 | 0.857756  | -0.534706 |
| 25 | 1  | 0 | -9.610766  | 1.817970  | -0.911178 |
| 26 | 6  | 0 | -11.392196 | -1.352633 | 0.436214  |
| 27 | 1  | 0 | -9.412062  | -2.115418 | 0.816784  |
| 28 | 6  | 0 | -12.148075 | -0.283134 | -0.049983 |
| 29 | 1  | 0 | -11.888230 | -2.241829 | 0.814064  |
| 30 | 7  | 0 | 5.844215   | 0.613175  | -0.043043 |
| 31 | 16 | 0 | 4.724946   | -1.807574 | 1.297430  |
| 32 | 6  | 0 | -1.037680  | 0.289692  | -0.049239 |
| 33 | 6  | 0 | -2.457032  | 0.216203  | -0.047065 |
| 34 | 6  | 0 | -3.235789  | 1.277987  | -0.554757 |
| 35 | 6  | 0 | -3.121052  | -0.920242 | 0.461999  |
| 36 | 6  | 0 | -4.620263  | 1.206244  | -0.553527 |
| 37 | 1  | 0 | -2.736701  | 2.157054  | -0.948790 |
| 38 | 6  | 0 | -4.505587  | -0.991891 | 0.462746  |
| 39 | 1  | 0 | -2.533230  | -1.743111 | 0.854973  |
| 40 | 6  | 0 | -5.284019  | 0.069706  | -0.045048 |
| 41 | 1  | 0 | -5.208248  | 2.028986  | -0.946636 |
| 42 | 1  | 0 | -5.004716  | -1.871075 | 0.856479  |
| 43 | 6  | 0 | -6.703978  | -0.004053 | -0.044988 |
| 44 | 6  | 0 | -7.919464  | -0.067107 | -0.045622 |

|    |   |   |            |           |           |
|----|---|---|------------|-----------|-----------|
| 45 | 6 | 0 | 6.528079   | 1.906034  | -0.140407 |
| 46 | 1 | 0 | 7.599570   | 1.699395  | -0.133592 |
| 47 | 1 | 0 | 6.315621   | 2.410939  | -1.096222 |
| 48 | 1 | 0 | -12.086994 | 1.691898  | -0.913762 |
| 49 | 1 | 0 | -13.232545 | -0.338437 | -0.051151 |
| 50 | 6 | 0 | 6.219192   | 2.838734  | 1.039325  |
| 51 | 1 | 0 | 5.143365   | 3.029798  | 1.101015  |
| 52 | 1 | 0 | 6.495842   | 2.321559  | 1.964976  |
| 53 | 6 | 0 | 6.974421   | 4.166133  | 0.925129  |
| 54 | 1 | 0 | 6.695777   | 4.709992  | 0.015200  |
| 55 | 1 | 0 | 6.754364   | 4.815314  | 1.777553  |
| 56 | 1 | 0 | 8.058960   | 4.010673  | 0.898523  |

-----  
Total Energy (HF) =-1648.0376056 Hartrees

**PTZ 2.** Calculation method: B3LYP/6-31G(d,p)

Standard orientation:

-----

| Center<br>Number | Atomic<br>Number | Atomic<br>Type | Coordinates (Angstroms) |          |           |
|------------------|------------------|----------------|-------------------------|----------|-----------|
|                  |                  |                | X                       | Y        | Z         |
| 1                | 6                | 0              | 4.283192                | 5.431746 | 0.223535  |
| 2                | 6                | 0              | 3.481824                | 4.492072 | 0.871349  |
| 3                | 6                | 0              | 3.739527                | 3.128362 | 0.728390  |
| 4                | 6                | 0              | 4.789736                | 2.676639 | -0.091227 |
| 5                | 6                | 0              | 5.554072                | 3.631357 | -0.778539 |

-----

|    |   |   |           |           |           |
|----|---|---|-----------|-----------|-----------|
| 6  | 6 | 0 | 5.315116  | 4.994621  | -0.604376 |
| 7  | 6 | 0 | 3.944250  | 0.412098  | -0.346043 |
| 8  | 6 | 0 | 2.772488  | 0.639951  | 0.414283  |
| 9  | 6 | 0 | 1.677138  | -0.200740 | 0.297377  |
| 10 | 1 | 0 | 0.796762  | 0.014875  | 0.893093  |
| 11 | 6 | 0 | 2.873843  | -1.559422 | -1.297455 |
| 12 | 6 | 0 | 3.965281  | -0.712481 | -1.194151 |
| 13 | 1 | 0 | 4.091464  | 6.491625  | 0.355121  |
| 14 | 1 | 0 | 2.657560  | 4.810886  | 1.501791  |
| 15 | 1 | 0 | 6.333023  | 3.315170  | -1.462523 |
| 16 | 1 | 0 | 5.931363  | 5.712447  | -1.136678 |
| 17 | 1 | 0 | 2.955452  | -2.425295 | -1.940702 |
| 18 | 1 | 0 | 4.849089  | -0.933334 | -1.779194 |
| 19 | 6 | 0 | -1.714174 | -1.604116 | 0.435479  |
| 20 | 6 | 0 | -1.880902 | -0.513987 | -0.447832 |
| 21 | 6 | 0 | -2.840988 | -2.049942 | 1.159161  |
| 22 | 6 | 0 | -3.100780 | 0.129769  | -0.570266 |
| 23 | 1 | 0 | -1.038517 | -0.157272 | -1.030780 |
| 24 | 6 | 0 | -4.066177 | -1.418655 | 1.026409  |
| 25 | 1 | 0 | -2.769022 | -2.917103 | 1.802608  |
| 26 | 6 | 0 | -4.220575 | -0.309179 | 0.167422  |
| 27 | 1 | 0 | -3.205160 | 0.975341  | -1.241042 |
| 28 | 1 | 0 | -4.924816 | -1.784835 | 1.578008  |
| 29 | 6 | 0 | -5.475163 | 0.340096  | 0.038050  |
| 30 | 6 | 0 | -7.811317 | 1.547633  | -0.200403 |
| 31 | 6 | 0 | -8.927748 | 1.093154  | 0.530571  |
| 32 | 6 | 0 | -7.959796 | 2.654760  | -1.060325 |

|    |    |   |            |           |           |
|----|----|---|------------|-----------|-----------|
| 33 | 6  | 0 | -10.156813 | 1.732250  | 0.401479  |
| 34 | 1  | 0 | -8.815616  | 0.240837  | 1.192413  |
| 35 | 6  | 0 | -9.193242  | 3.286762  | -1.182071 |
| 36 | 1  | 0 | -7.101930  | 3.005586  | -1.624352 |
| 37 | 6  | 0 | -10.293822 | 2.828917  | -0.453265 |
| 38 | 1  | 0 | -9.297496  | 4.138601  | -1.847237 |
| 39 | 6  | 0 | -0.396987  | -2.241262 | 0.552122  |
| 40 | 7  | 0 | 5.031290   | 1.281461  | -0.233216 |
| 41 | 16 | 0 | 2.772897   | 1.936788  | 1.634781  |
| 42 | 6  | 0 | -6.551811  | 0.897386  | -0.072123 |
| 43 | 6  | 0 | 1.693307   | -1.320826 | -0.565450 |
| 44 | 6  | 0 | 0.517746   | -2.187078 | -0.645938 |
| 45 | 6  | 0 | 6.377886   | 0.811944  | -0.594420 |
| 46 | 1  | 0 | 6.432976   | 0.534474  | -1.657106 |
| 47 | 1  | 0 | 7.054111   | 1.656209  | -0.459145 |
| 48 | 6  | 0 | 0.157644   | -2.956152 | -1.731651 |
| 49 | 6  | 0 | -0.963281  | -3.846939 | -1.668424 |
| 50 | 6  | 0 | 0.825765   | -2.936808 | -2.997105 |
| 51 | 7  | 0 | -1.866008  | -4.580899 | -1.632842 |
| 52 | 7  | 0 | 1.328895   | -2.939152 | -4.046977 |
| 53 | 6  | 0 | 0.083487   | -2.873154 | 1.675160  |
| 54 | 6  | 0 | -0.592230  | -2.914755 | 2.937602  |
| 55 | 6  | 0 | 1.354015   | -3.538913 | 1.666353  |
| 56 | 7  | 0 | -1.091357  | -2.960770 | 3.987962  |
| 57 | 7  | 0 | 2.379013   | -4.089622 | 1.681122  |
| 58 | 1  | 0 | -11.254839 | 3.324688  | -0.551365 |
| 59 | 1  | 0 | -11.010760 | 1.374372  | 0.968557  |

|    |   |   |          |           |           |
|----|---|---|----------|-----------|-----------|
| 60 | 6 | 0 | 6.870259 | -0.337934 | 0.296106  |
| 61 | 1 | 0 | 6.849135 | 0.002586  | 1.337369  |
| 62 | 1 | 0 | 6.186278 | -1.190167 | 0.235387  |
| 63 | 6 | 0 | 8.284171 | -0.782797 | -0.089694 |
| 64 | 1 | 0 | 8.627531 | -1.591612 | 0.561187  |
| 65 | 1 | 0 | 8.322134 | -1.150353 | -1.121373 |
| 66 | 1 | 0 | 9.002446 | 0.040269  | -0.003419 |

-----  
Total Energy (HF) = -2095.6229188 Hartrees

**PTZ 3.** Calculation method: B3LYP/6-31G(d,p)

Standard orientation:

-----

| Center | Atomic | Atomic | Coordinates (Angstroms) |           |           |
|--------|--------|--------|-------------------------|-----------|-----------|
| Number | Number | Type   | X                       | Y         | Z         |
| 1      | 6      | 0      | -5.671132               | -4.382071 | -2.827293 |
| 2      | 6      | 0      | -4.675260               | -4.229945 | -1.862970 |
| 3      | 6      | 0      | -4.645230               | -3.092474 | -1.055571 |
| 4      | 6      | 0      | -5.591950               | -2.066141 | -1.223103 |
| 5      | 6      | 0      | -6.567201               | -2.216461 | -2.220201 |
| 6      | 6      | 0      | -6.614326               | -3.370921 | -3.001492 |
| 7      | 6      | 0      | -4.277414               | -0.345615 | -0.118144 |
| 8      | 6      | 0      | -3.177572               | -1.193933 | 0.158469  |
| 9      | 6      | 0      | -1.929771               | -0.667692 | 0.456063  |
| 10     | 1      | 0      | -1.112397               | -1.353282 | 0.655441  |

|    |   |   |           |           |           |
|----|---|---|-----------|-----------|-----------|
| 11 | 6 | 0 | -2.809645 | 1.565160  | 0.244648  |
| 12 | 6 | 0 | -4.055689 | 1.044097  | -0.072025 |
| 13 | 1 | 0 | -5.702687 | -5.278182 | -3.438391 |
| 14 | 1 | 0 | -3.921878 | -4.998702 | -1.721898 |
| 15 | 1 | 0 | -7.295096 | -1.431812 | -2.389835 |
| 16 | 1 | 0 | -7.387598 | -3.468180 | -3.757177 |
| 17 | 1 | 0 | -2.697392 | 2.639818  | 0.327956  |
| 18 | 1 | 0 | -4.866523 | 1.731241  | -0.280342 |
| 19 | 6 | 0 | 1.696181  | -0.083575 | 1.458465  |
| 20 | 6 | 0 | 1.886010  | -0.474842 | 0.115024  |
| 21 | 6 | 0 | 2.771579  | -0.259188 | 2.355531  |
| 22 | 6 | 0 | 3.076185  | -1.044220 | -0.307235 |
| 23 | 1 | 0 | 1.081309  | -0.342711 | -0.599906 |
| 24 | 6 | 0 | 3.970175  | -0.811516 | 1.933444  |
| 25 | 1 | 0 | 2.681961  | 0.063308  | 3.385424  |
| 26 | 6 | 0 | 4.145911  | -1.223808 | 0.594994  |
| 27 | 1 | 0 | 3.196153  | -1.352540 | -1.339980 |
| 28 | 1 | 0 | 4.790216  | -0.923983 | 2.634015  |
| 29 | 6 | 0 | 5.372133  | -1.792550 | 0.163723  |
| 30 | 6 | 0 | 7.653917  | -2.846387 | -0.646171 |
| 31 | 6 | 0 | 8.714291  | -3.041245 | 0.261990  |
| 32 | 6 | 0 | 7.828830  | -3.219649 | -1.994233 |
| 33 | 6 | 0 | 9.914889  | -3.594670 | -0.171642 |
| 34 | 1 | 0 | 8.581858  | -2.754517 | 1.299930  |
| 35 | 6 | 0 | 9.033562  | -3.771890 | -2.417607 |
| 36 | 1 | 0 | 7.014078  | -3.069913 | -2.694874 |
| 37 | 6 | 0 | 10.078710 | -3.961004 | -1.509910 |

|    |    |   |           |           |           |
|----|----|---|-----------|-----------|-----------|
| 38 | 1  | 0 | 9.158650  | -4.055463 | -3.458201 |
| 39 | 6  | 0 | 0.404878  | 0.496964  | 1.865354  |
| 40 | 7  | 0 | -5.528690 | -0.900202 | -0.412560 |
| 41 | 16 | 0 | -3.439625 | -2.952515 | 0.249013  |
| 42 | 6  | 0 | 6.423877  | -2.279110 | -0.208936 |
| 43 | 6  | 0 | -1.706495 | 0.726630  | 0.503198  |
| 44 | 6  | 0 | -6.752202 | -0.115218 | -0.193348 |
| 45 | 1  | 0 | -6.484189 | 0.723871  | 0.449485  |
| 46 | 1  | 0 | -7.126086 | 0.316087  | -1.133716 |
| 47 | 6  | 0 | 1.845627  | 5.925806  | -1.487651 |
| 48 | 6  | 0 | 2.977649  | 6.574320  | -0.916107 |
| 49 | 6  | 0 | 1.294425  | 6.508056  | -2.664952 |
| 50 | 7  | 0 | 3.904946  | 7.091545  | -0.434662 |
| 51 | 7  | 0 | 0.828559  | 6.967831  | -3.629780 |
| 52 | 6  | 0 | -0.139745 | 0.339778  | 3.123475  |
| 53 | 6  | 0 | 0.402362  | -0.506466 | 4.144140  |
| 54 | 6  | 0 | -1.331798 | 1.032464  | 3.517447  |
| 55 | 7  | 0 | 0.795321  | -1.189204 | 5.001432  |
| 56 | 7  | 0 | -2.284442 | 1.595979  | 3.877498  |
| 57 | 6  | 0 | -0.381023 | 1.255506  | 0.839703  |
| 58 | 6  | 0 | 0.174801  | 2.389967  | 0.245533  |
| 59 | 6  | 0 | -0.362243 | 2.981717  | -0.961389 |
| 60 | 6  | 0 | 1.336104  | 3.046711  | 0.806706  |
| 61 | 6  | 0 | 0.172914  | 4.100533  | -1.518103 |
| 62 | 1  | 0 | -1.182654 | 2.484843  | -1.464628 |
| 63 | 6  | 0 | 1.861134  | 4.177850  | 0.266748  |
| 64 | 1  | 0 | 1.776398  | 2.647441  | 1.712860  |

|    |   |   |           |           |           |
|----|---|---|-----------|-----------|-----------|
| 65 | 6 | 0 | 1.302143  | 4.769258  | -0.922833 |
| 66 | 1 | 0 | -0.234078 | 4.493908  | -2.443742 |
| 67 | 1 | 0 | 2.713417  | 4.658654  | 0.735156  |
| 68 | 1 | 0 | 11.017518 | -4.391996 | -1.844276 |
| 69 | 1 | 0 | 10.725793 | -3.740509 | 0.535484  |
| 70 | 6 | 0 | -7.856813 | -0.913353 | 0.513344  |
| 71 | 1 | 0 | -8.127285 | -1.793875 | -0.077313 |
| 72 | 1 | 0 | -7.456459 | -1.285369 | 1.462985  |
| 73 | 6 | 0 | -9.100268 | -0.053981 | 0.761002  |
| 74 | 1 | 0 | -9.528849 | 0.313093  | -0.178459 |
| 75 | 1 | 0 | -9.874941 | -0.631207 | 1.273521  |
| 76 | 1 | 0 | -8.870155 | 0.817234  | 1.384275  |

-----  
Total Energy (HF) =-2326.6698198 Hartrees

**PTZ 4.** Calculation method: B3LYP/6-31G(d,p)

Standard orientation:

-----

| Center<br>Number | Atomic<br>Number | Atomic<br>Type | Coordinates (Angstroms) |           |          |
|------------------|------------------|----------------|-------------------------|-----------|----------|
|                  |                  |                | X                       | Y         | Z        |
| 1                | 6                | 0              | 1.242092                | 0.573794  | 0.285135 |
| 2                | 6                | 0              | 2.037028                | -0.581649 | 0.289631 |
| 3                | 6                | 0              | 3.423413                | -0.484482 | 0.331965 |
| 4                | 6                | 0              | 4.102099                | 0.754573  | 0.322852 |
| 5                | 6                | 0              | 3.287750                | 1.908911  | 0.351994 |
| 6                | 6                | 0              | 1.905320                | 1.818132  | 0.340320 |

-----



|    |    |   |            |           |           |
|----|----|---|------------|-----------|-----------|
| 7  | 6  | 0 | 6.296505   | -0.216344 | -0.223728 |
| 8  | 6  | 0 | 5.832218   | -1.548739 | -0.256936 |
| 9  | 6  | 0 | 6.578689   | -2.585687 | -0.819032 |
| 10 | 1  | 0 | 6.148903   | -3.581890 | -0.830964 |
| 11 | 6  | 0 | 7.844987   | -2.333243 | -1.329952 |
| 12 | 6  | 0 | 8.348472   | -1.031891 | -1.260336 |
| 13 | 6  | 0 | 7.594650   | 0.009164  | -0.728936 |
| 14 | 1  | 0 | 1.582401   | -1.565997 | 0.275038  |
| 15 | 1  | 0 | 3.732321   | 2.894362  | 0.358740  |
| 16 | 1  | 0 | 1.315498   | 2.728572  | 0.352796  |
| 17 | 1  | 0 | 8.433873   | -3.133769 | -1.764255 |
| 18 | 1  | 0 | 9.340549   | -0.812969 | -1.643838 |
| 19 | 1  | 0 | 8.017535   | 1.004139  | -0.732825 |
| 20 | 6  | 0 | -0.175726  | 0.494400  | 0.236982  |
| 21 | 6  | 0 | -9.680100  | -0.080768 | -0.168982 |
| 22 | 6  | 0 | -10.468761 | 1.086955  | -0.209985 |
| 23 | 6  | 0 | -10.321126 | -1.336039 | -0.194834 |
| 24 | 6  | 0 | -11.855893 | 0.997010  | -0.275292 |
| 25 | 1  | 0 | -9.979645  | 2.055312  | -0.190228 |
| 26 | 6  | 0 | -11.708949 | -1.415558 | -0.260080 |
| 27 | 1  | 0 | -9.718259  | -2.237637 | -0.163255 |
| 28 | 6  | 0 | -12.481081 | -0.252043 | -0.300571 |
| 29 | 1  | 0 | -12.190527 | -2.388766 | -0.279372 |
| 30 | 7  | 0 | 5.500110   | 0.840749  | 0.254466  |
| 31 | 16 | 0 | 4.346915   | -1.971553 | 0.608972  |
| 32 | 6  | 0 | -1.390111  | 0.426998  | 0.191402  |
| 33 | 6  | 0 | -2.807853  | 0.341238  | 0.134677  |

|    |   |   |            |           |           |
|----|---|---|------------|-----------|-----------|
| 34 | 6 | 0 | -3.601223  | 1.507622  | 0.108584  |
| 35 | 6 | 0 | -3.452411  | -0.913510 | 0.100946  |
| 36 | 6 | 0 | -4.983708  | 1.422992  | 0.049493  |
| 37 | 1 | 0 | -3.115949  | 2.477654  | 0.134667  |
| 38 | 6 | 0 | -4.834947  | -0.997572 | 0.042104  |
| 39 | 1 | 0 | -2.851945  | -1.816815 | 0.121342  |
| 40 | 6 | 0 | -5.628833  | 0.168607  | 0.014539  |
| 41 | 1 | 0 | -5.584288  | 2.326282  | 0.029229  |
| 42 | 1 | 0 | -5.320324  | -1.967445 | 0.016238  |
| 43 | 6 | 0 | -7.046577  | 0.081738  | -0.048187 |
| 44 | 6 | 0 | -8.260063  | 0.006527  | -0.103296 |
| 45 | 6 | 0 | 6.144270   | 2.131208  | 0.550566  |
| 46 | 1 | 0 | 5.579601   | 2.598955  | 1.361984  |
| 47 | 1 | 0 | 7.132054   | 1.913148  | 0.965940  |
| 48 | 1 | 0 | -12.451917 | 1.904327  | -0.306581 |
| 49 | 1 | 0 | -13.563732 | -0.318368 | -0.351437 |
| 50 | 6 | 0 | 6.274393   | 3.107213  | -0.632169 |
| 51 | 1 | 0 | 6.826226   | 2.629804  | -1.448421 |
| 52 | 1 | 0 | 5.283308   | 3.333363  | -1.038841 |
| 53 | 6 | 0 | 6.976231   | 4.402706  | -0.212803 |
| 54 | 1 | 0 | 7.063102   | 5.092408  | -1.056985 |
| 55 | 1 | 0 | 6.424983   | 4.918286  | 0.581649  |
| 56 | 1 | 0 | 7.987341   | 4.207036  | 0.161646  |
| 57 | 8 | 0 | 4.654536   | -2.063275 | 2.047136  |
| 58 | 8 | 0 | 3.684585   | -3.108470 | -0.051326 |

---

Total Energy (HF) = -1798.417541 Hartrees

**PTZ 5.** Calculation method: B3LYP/6-31G(d,p)

Standard orientation:

---

| Center<br>Number | Atomic<br>Number | Atomic<br>Type | Coordinates (Angstroms) |           |           |
|------------------|------------------|----------------|-------------------------|-----------|-----------|
|                  |                  |                | X                       | Y         | Z         |
| 1                | 6                | 0              | -4.556916               | -5.072976 | 0.480142  |
| 2                | 6                | 0              | -3.605202               | -4.184655 | 0.963579  |
| 3                | 6                | 0              | -3.763664               | -2.812919 | 0.758961  |
| 4                | 6                | 0              | -4.848380               | -2.279951 | 0.032081  |
| 5                | 6                | 0              | -5.809368               | -3.200767 | -0.432722 |
| 6                | 6                | 0              | -5.664512               | -4.565021 | -0.202343 |
| 7                | 6                | 0              | -3.857033               | -0.047834 | -0.238016 |
| 8                | 6                | 0              | -2.661696               | -0.371831 | 0.446591  |
| 9                | 6                | 0              | -1.527465               | 0.424236  | 0.381765  |
| 10               | 1                | 0              | -0.647505               | 0.093541  | 0.923802  |
| 11               | 6                | 0              | -2.734612               | 1.988850  | -0.982886 |
| 12               | 6                | 0              | -3.862179               | 1.192636  | -0.921059 |
| 13               | 1                | 0              | -4.444619               | -6.139877 | 0.638870  |
| 14               | 1                | 0              | -2.735303               | -4.527866 | 1.513703  |
| 15               | 1                | 0              | -6.666583               | -2.863287 | -0.998170 |
| 16               | 1                | 0              | -6.424986               | -5.240665 | -0.581626 |
| 17               | 1                | 0              | -2.806480               | 2.930868  | -1.510745 |
| 18               | 1                | 0              | -4.751793               | 1.538370  | -1.427807 |
| 19               | 6                | 0              | 1.938154                | 1.667879  | 0.508109  |
| 20               | 6                | 0              | 2.018223                | 0.629772  | -0.447578 |

---

|    |    |   |           |           |           |
|----|----|---|-----------|-----------|-----------|
| 21 | 6  | 0 | 3.109611  | 2.003615  | 1.221135  |
| 22 | 6  | 0 | 3.196520  | -0.066802 | -0.654280 |
| 23 | 1  | 0 | 1.140248  | 0.353432  | -1.021540 |
| 24 | 6  | 0 | 4.293594  | 1.319528  | 1.005064  |
| 25 | 1  | 0 | 3.105570  | 2.826376  | 1.923808  |
| 26 | 6  | 0 | 4.361373  | 0.264150  | 0.069819  |
| 27 | 1  | 0 | 3.232599  | -0.871874 | -1.379636 |
| 28 | 1  | 0 | 5.187200  | 1.601995  | 1.550270  |
| 29 | 6  | 0 | 5.574673  | -0.436996 | -0.148214 |
| 30 | 6  | 0 | 7.833802  | -1.740700 | -0.559034 |
| 31 | 6  | 0 | 8.991087  | -1.413917 | 0.176637  |
| 32 | 6  | 0 | 7.899756  | -2.771839 | -1.518097 |
| 33 | 6  | 0 | 10.179365 | -2.102851 | -0.044773 |
| 34 | 1  | 0 | 8.942425  | -0.620739 | 0.915238  |
| 35 | 6  | 0 | 9.093115  | -3.454269 | -1.731967 |
| 36 | 1  | 0 | 7.010118  | -3.024606 | -2.085351 |
| 37 | 6  | 0 | 10.234745 | -3.123089 | -0.997743 |
| 38 | 1  | 0 | 9.133768  | -4.246678 | -2.473161 |
| 39 | 6  | 0 | 0.663480  | 2.365455  | 0.707991  |
| 40 | 7  | 0 | -4.955352 | -0.901557 | -0.259262 |
| 41 | 16 | 0 | -2.659284 | -1.717476 | 1.603364  |
| 42 | 6  | 0 | 6.615897  | -1.038691 | -0.337377 |
| 43 | 6  | 0 | -1.520293 | 1.612154  | -0.366946 |
| 44 | 6  | 0 | -0.297684 | 2.416636  | -0.452586 |
| 45 | 6  | 0 | -6.248014 | -0.384788 | -0.750934 |
| 46 | 1  | 0 | -6.341047 | 0.647378  | -0.403516 |
| 47 | 1  | 0 | -7.034113 | -0.940477 | -0.233867 |

|    |   |   |           |           |           |
|----|---|---|-----------|-----------|-----------|
| 48 | 6 | 0 | 0.046362  | 3.211567  | -1.520570 |
| 49 | 6 | 0 | 1.216390  | 4.039575  | -1.487151 |
| 50 | 6 | 0 | -0.693177 | 3.276285  | -2.745644 |
| 51 | 7 | 0 | 2.156620  | 4.725016  | -1.478600 |
| 52 | 7 | 0 | -1.258340 | 3.341399  | -3.761024 |
| 53 | 6 | 0 | 0.255159  | 2.976727  | 1.871157  |
| 54 | 6 | 0 | 0.976795  | 2.946936  | 3.107606  |
| 55 | 6 | 0 | -0.976272 | 3.710340  | 1.922420  |
| 56 | 7 | 0 | 1.519681  | 2.945128  | 4.136966  |
| 57 | 7 | 0 | -1.968873 | 4.315922  | 1.970250  |
| 58 | 1 | 0 | 11.164201 | -3.658065 | -1.167628 |
| 59 | 1 | 0 | 11.065266 | -1.843747 | 0.526984  |
| 60 | 6 | 0 | -6.457096 | -0.455103 | -2.273060 |
| 61 | 1 | 0 | -5.666540 | 0.105373  | -2.782698 |
| 62 | 1 | 0 | -6.353205 | -1.490314 | -2.614102 |
| 63 | 6 | 0 | -7.829862 | 0.094760  | -2.673474 |
| 64 | 1 | 0 | -7.969411 | 0.043421  | -3.756621 |
| 65 | 1 | 0 | -8.641513 | -0.473944 | -2.206189 |
| 66 | 1 | 0 | -7.945107 | 1.142197  | -2.373697 |
| 67 | 8 | 0 | -3.308000 | -1.259647 | 2.842320  |
| 68 | 8 | 0 | -1.313109 | -2.307748 | 1.671670  |

-----  
Total Energy (HF) = -2246.0003846 Hartrees

**PTZ 6.** Calculation method: B3LYP/6-31G(d,p)

Standard orientation:

| Center<br>Number | Atomic<br>Number | Atomic<br>Type | Coordinates (Angstroms) |           |           |
|------------------|------------------|----------------|-------------------------|-----------|-----------|
|                  |                  |                | X                       | Y         | Z         |
| 1                | 6                | 0              | -5.614881               | -4.688490 | -2.277265 |
| 2                | 6                | 0              | -4.513704               | -4.378560 | -1.490075 |
| 3                | 6                | 0              | -4.458627               | -3.157298 | -0.816115 |
| 4                | 6                | 0              | -5.473329               | -2.184594 | -0.934526 |
| 5                | 6                | 0              | -6.589036               | -2.531461 | -1.723973 |
| 6                | 6                | 0              | -6.655215               | -3.761247 | -2.370807 |
| 7                | 6                | 0              | -4.145007               | -0.365406 | 0.050175  |
| 8                | 6                | 0              | -2.994339               | -1.161473 | 0.258943  |
| 9                | 6                | 0              | -1.751558               | -0.615255 | 0.549645  |
| 10               | 1                | 0              | -0.916423               | -1.296343 | 0.679437  |
| 11               | 6                | 0              | -2.737618               | 1.570380  | 0.531970  |
| 12               | 6                | 0              | -3.975569               | 1.027114  | 0.238013  |
| 13               | 1                | 0              | -5.668284               | -5.636995 | -2.800285 |
| 14               | 1                | 0              | -3.687689               | -5.071840 | -1.370711 |
| 15               | 1                | 0              | -7.405407               | -1.835983 | -1.859515 |
| 16               | 1                | 0              | -7.530212               | -3.986204 | -2.972907 |
| 17               | 1                | 0              | -2.667644               | 2.639199  | 0.699083  |
| 18               | 1                | 0              | -4.817002               | 1.700025  | 0.151650  |
| 19               | 6                | 0              | 1.865750                | 0.025932  | 1.461030  |
| 20               | 6                | 0              | 1.994761                | -0.343649 | 0.103875  |
| 21               | 6                | 0              | 2.982866                | -0.159954 | 2.304423  |
| 22               | 6                | 0              | 3.165440                | -0.901899 | -0.382195 |
| 23               | 1                | 0              | 1.157774                | -0.206225 | -0.571869 |

|    |    |   |           |           |           |
|----|----|---|-----------|-----------|-----------|
| 24 | 6  | 0 | 4.161707  | -0.700673 | 1.818088  |
| 25 | 1  | 0 | 2.941192  | 0.143978  | 3.342694  |
| 26 | 6  | 0 | 4.276449  | -1.091440 | 0.466447  |
| 27 | 1  | 0 | 3.236867  | -1.195739 | -1.423517 |
| 28 | 1  | 0 | 5.013373  | -0.821983 | 2.478236  |
| 29 | 6  | 0 | 5.483433  | -1.648579 | -0.028342 |
| 30 | 6  | 0 | 7.733030  | -2.682255 | -0.946646 |
| 31 | 6  | 0 | 8.833568  | -2.875139 | -0.087063 |
| 32 | 6  | 0 | 7.850329  | -3.047703 | -2.303055 |
| 33 | 6  | 0 | 10.017093 | -3.419011 | -0.576051 |
| 34 | 1  | 0 | 8.745111  | -2.594879 | 0.957299  |
| 35 | 6  | 0 | 9.038441  | -3.590529 | -2.781907 |
| 36 | 1  | 0 | 7.004284  | -2.900254 | -2.966050 |
| 37 | 6  | 0 | 10.123713 | -3.777734 | -1.922139 |
| 38 | 1  | 0 | 9.119037  | -3.868706 | -3.828330 |
| 39 | 6  | 0 | 0.595401  | 0.596760  | 1.936098  |
| 40 | 7  | 0 | -5.368848 | -0.911857 | -0.333462 |
| 41 | 16 | 0 | -3.161328 | -2.924944 | 0.365702  |
| 42 | 6  | 0 | 6.520310  | -2.125480 | -0.451820 |
| 43 | 6  | 0 | -1.578174 | 0.773324  | 0.660204  |
| 44 | 6  | 0 | -6.579264 | -0.072511 | -0.245548 |
| 45 | 1  | 0 | -6.486848 | 0.539954  | 0.655284  |
| 46 | 1  | 0 | -7.423145 | -0.741587 | -0.059795 |
| 47 | 6  | 0 | 1.678925  | 6.144947  | -1.355328 |
| 48 | 6  | 0 | 2.832815  | 6.806175  | -0.843511 |
| 49 | 6  | 0 | 1.028996  | 6.751707  | -2.469011 |
| 50 | 7  | 0 | 3.778481  | 7.334012  | -0.412655 |

|    |   |   |           |           |           |
|----|---|---|-----------|-----------|-----------|
| 51 | 7 | 0 | 0.482655  | 7.230589  | -3.380544 |
| 52 | 6 | 0 | 0.117623  | 0.461113  | 3.223345  |
| 53 | 6 | 0 | 0.719429  | -0.348420 | 4.239746  |
| 54 | 6 | 0 | -1.057666 | 1.161288  | 3.652916  |
| 55 | 7 | 0 | 1.168207  | -0.993060 | 5.098911  |
| 56 | 7 | 0 | -1.995547 | 1.741594  | 4.025003  |
| 57 | 6 | 0 | -0.255189 | 1.345315  | 0.952307  |
| 58 | 6 | 0 | 0.224900  | 2.512017  | 0.365607  |
| 59 | 6 | 0 | -0.414479 | 3.131227  | -0.778410 |
| 60 | 6 | 0 | 1.408903  | 3.181067  | 0.866871  |
| 61 | 6 | 0 | 0.051821  | 4.280600  | -1.331301 |
| 62 | 1 | 0 | -1.260435 | 2.632893  | -1.235835 |
| 63 | 6 | 0 | 1.866445  | 4.341264  | 0.330388  |
| 64 | 1 | 0 | 1.923193  | 2.760398  | 1.722720  |
| 65 | 6 | 0 | 1.207666  | 4.957280  | -0.795441 |
| 66 | 1 | 0 | -0.432574 | 4.697513  | -2.208030 |
| 67 | 1 | 0 | 2.739561  | 4.828514  | 0.751204  |
| 68 | 1 | 0 | 11.049230 | -4.201701 | -2.299769 |
| 69 | 1 | 0 | 10.859135 | -3.563705 | 0.093930  |
| 70 | 8 | 0 | -3.677674 | -3.258534 | 1.702871  |
| 71 | 8 | 0 | -1.924976 | -3.567964 | -0.107624 |
| 72 | 6 | 0 | -6.864853 | 0.817626  | -1.466742 |
| 73 | 1 | 0 | -6.946993 | 0.198896  | -2.366335 |
| 74 | 1 | 0 | -6.016895 | 1.487499  | -1.644457 |
| 75 | 6 | 0 | -8.145883 | 1.635519  | -1.273582 |
| 76 | 1 | 0 | -9.017521 | 0.986885  | -1.131938 |
| 77 | 1 | 0 | -8.075467 | 2.289541  | -0.397424 |



78 1 0 -8.340948 2.267591 -2.144171

-----  
Total Energy (HF) =-2477.0471742 Hartrees

### TD-DFT Calculation data

Calculation method: B3LYP/6-31G(d,p) and CAM-B3LYP/6-31G(d,p) level in dichloromethane solvent/ gas phase.

**TD-DFT of PTZ 1 in DCM solvent.** Calculation method: B3LYP/6-31G(d,p)

Excitation energies and oscillator strengths:

Excited State 1: Singlet-A 2.9125 eV 425.69 nm f=1.3216  
<S\*\*2>=0.000

116 ->117 0.69773

This state for optimization and/or second-order correction.

Total Energy, E(TD-HF/TD-KS) = -1647.93945641

Copying the excited state density for this state as the 1-particle RhoCI density.

Excited State 2: Singlet-A 3.5073 eV 353.50 nm f=1.1583  
<S\*\*2>=0.000

115 ->117 0.69505

Excited State 3: Singlet-A 3.7968 eV 326.55 nm f=0.0031  
<S\*\*2>=0.000

116 ->118 0.55801

116 ->119 0.32969

116 ->120 0.18371

Excited State 4: Singlet-A 3.9474 eV 314.09 nm f=0.0290  
<S\*\*2>=0.000

114 ->117 0.46513

116 ->118 -0.26610

116 ->119 0.42088

Excited State 5: Singlet-A 4.1333 eV 299.96 nm f=0.0269  
<S\*\*2>=0.000

|           |          |
|-----------|----------|
| 114 ->117 | 0.43616  |
| 116 ->118 | 0.11148  |
| 116 ->119 | -0.40278 |
| 116 ->120 | 0.32185  |

Excited State 6: Singlet-A 4.1994 eV 295.24 nm f=0.0764  
<S\*\*2>=0.000

|           |          |
|-----------|----------|
| 114 ->117 | -0.27536 |
| 116 ->118 | -0.22503 |
| 116 ->119 | 0.12022  |
| 116 ->120 | 0.55979  |
| 116 ->123 | 0.13370  |

Excited State 7: Singlet-A 4.3233 eV 286.78 nm f=0.0011  
<S\*\*2>=0.000

|           |         |
|-----------|---------|
| 110 ->117 | 0.33805 |
| 115 ->121 | 0.22268 |
| 116 ->121 | 0.57342 |

Excited State 8: Singlet-A 4.3710 eV 283.65 nm f=0.0026  
<S\*\*2>=0.000

|           |          |
|-----------|----------|
| 113 ->117 | 0.60389  |
| 115 ->118 | -0.23348 |
| 116 ->123 | -0.23593 |

Excited State 9: Singlet-A 4.5319 eV 273.58 nm f=0.0087  
<S\*\*2>=0.000

|           |          |
|-----------|----------|
| 113 ->117 | 0.32998  |
| 114 ->118 | -0.10324 |
| 115 ->118 | 0.47921  |
| 116 ->118 | 0.17036  |
| 116 ->123 | 0.26541  |

Excited State 10: Singlet-A 4.5531 eV 272.31 nm f=0.0002  
<S\*\*2>=0.000

|           |         |
|-----------|---------|
| 112 ->117 | 0.45109 |
| 112 ->118 | 0.12487 |
| 115 ->122 | 0.26567 |

116 ->122      0.43512

**TD-DFT of PTZ 2 in gas phase.** Calculation method: B3LYP/6-31G(d,p)

Excitation energies and oscillator strengths:

Excited State 1:    Singlet-A    1.9323 eV 641.64 nm f=0.0600  
<S\*\*2>=0.000

148 ->149      0.70132

This state for optimization and/or second-order correction.

Total Energy, E(TD-HF/TD-KS) = -2095.55190839

Copying the excited state density for this state as the 1-particle RhoCI density.

Excited State 2:    Singlet-A    2.5287 eV 490.30 nm f=0.1934  
<S\*\*2>=0.000

146 ->149      0.13433

147 ->149      0.11035

148 ->150      0.67452

Excited State 3:    Singlet-A    2.5565 eV 484.98 nm f=0.2569  
<S\*\*2>=0.000

147 ->149      0.67970

147 ->150      0.15010

Excited State 4:    Singlet-A    2.8935 eV 428.49 nm f=0.0920  
<S\*\*2>=0.000

146 ->149      0.68240

148 ->150     -0.13071

Excited State 5:    Singlet-A    3.1089 eV 398.80 nm f=0.6022  
<S\*\*2>=0.000

147 ->149     -0.14801

147 ->150      0.67631

Excited State 6:    Singlet-A    3.3608 eV 368.91 nm f=0.0205  
<S\*\*2>=0.000

143 ->149      0.10793

145 ->149      0.56524

146 ->150     -0.38050

Excited State 7: Singlet-A 3.5087 eV 353.36 nm f=0.1639  
<S\*\*2>=0.000  
145 ->149 0.36242  
146 ->150 0.57118  
148 ->152 0.11418

Excited State 8: Singlet-A 3.6469 eV 339.97 nm f=0.0014  
<S\*\*2>=0.000  
144 ->149 0.70167

Excited State 9: Singlet-A 3.6615 eV 338.62 nm f=0.0150  
<S\*\*2>=0.000  
141 ->149 0.49716  
142 ->149 -0.39358  
143 ->149 -0.27014

Excited State 10: Singlet-A 3.7090 eV 334.28 nm f=0.0426  
<S\*\*2>=0.000  
142 ->149 -0.38546  
143 ->149 0.53112  
143 ->150 0.11864  
148 ->151 -0.10424  
148 ->152 -0.12052

Excited State 11: Singlet-A 3.7986 eV 326.40 nm f=0.0542  
<S\*\*2>=0.000  
140 ->149 -0.15840  
141 ->149 0.31644  
142 ->149 0.22334  
143 ->149 0.24061  
145 ->150 -0.11878  
148 ->151 0.32799  
148 ->152 0.29750  
148 ->154 -0.11899

Excited State 12: Singlet-A 3.8089 eV 325.52 nm f=0.0060  
<S\*\*2>=0.000  
140 ->149 0.62099  
140 ->150 -0.18216

148 ->151 0.19503  
148 ->152 0.12862

Excited State 13: Singlet-A 3.8257 eV 324.08 nm f=0.0299  
<S\*\*2>=0.000

140 ->149 -0.18749  
141 ->149 -0.32598  
142 ->149 -0.32922  
145 ->150 0.13337  
148 ->151 0.38758  
148 ->152 0.16808  
148 ->154 -0.13210

Excited State 14: Singlet-A 3.9562 eV 313.39 nm f=0.0716  
<S\*\*2>=0.000

145 ->150 0.10277  
146 ->150 -0.10320  
148 ->151 -0.41288  
148 ->152 0.51799

Excited State 15: Singlet-A 4.0138 eV 308.89 nm f=0.1551  
<S\*\*2>=0.000

139 ->149 -0.20533  
141 ->149 0.13297  
143 ->149 0.11980  
145 ->150 0.61006

**TD-DFT of PTZ 3 in gas phase.** Calculation method: B3LYP/6-31G(d,p)

Excitation energies and oscillator strengths:

Excited State 1: Singlet-A 1.6026 eV 773.62 nm f=0.2219  
<S\*\*2>=0.000

167 ->169 0.17017  
168 ->169 0.67460  
168 ->170 0.10295

This state for optimization and/or second-order correction.

Total Energy, E(TD-HF/TD-KS) = -2326.61092378

Copying the excited state density for this state as the 1-particle RhoCI density.

Excited State 2: Singlet-A 2.1552 eV 575.28 nm f=0.1193  
<S\*\*2>=0.000

166 ->169 0.57619  
167 ->169 0.39641

Excited State 3: Singlet-A 2.2156 eV 559.59 nm f=0.0705  
<S\*\*2>=0.000

165 ->169 -0.10629  
166 ->169 0.24528  
167 ->169 -0.39336  
168 ->170 0.50677

Excited State 4: Singlet-A 2.4562 eV 504.79 nm f=0.5400  
<S\*\*2>=0.000

165 ->169 0.29692  
166 ->169 -0.25335  
166 ->170 -0.10510  
167 ->169 0.29282  
168 ->169 -0.18540  
168 ->170 0.45750

Excited State 5: Singlet-A 2.6357 eV 470.40 nm f=0.1273  
<S\*\*2>=0.000

165 ->169 0.60516  
166 ->169 0.10492  
166 ->170 0.19409  
167 ->169 -0.18400  
167 ->170 -0.16486  
168 ->170 -0.12162

Excited State 6: Singlet-A 2.9429 eV 421.31 nm f=0.3088  
<S\*\*2>=0.000

162 ->169 -0.11093  
163 ->169 0.14942  
165 ->169 0.11428  
166 ->169 0.13631  
167 ->170 0.64264

Excited State 7: Singlet-A 3.1563 eV 392.82 nm f=0.8472  
<S\*\*2>=0.000  
162 ->169 0.16705  
165 ->169 -0.10282  
166 ->170 0.63392  
167 ->169 0.15649

Excited State 8: Singlet-A 3.2985 eV 375.88 nm f=0.0572  
<S\*\*2>=0.000  
162 ->169 0.23249  
163 ->169 0.62499  
166 ->170 -0.11184  
167 ->170 -0.11385

Excited State 9: Singlet-A 3.3018 eV 375.50 nm f=0.0010  
<S\*\*2>=0.000  
164 ->169 0.70422

Excited State 10: Singlet-A 3.3672 eV 368.21 nm f=0.0412  
<S\*\*2>=0.000  
158 ->169 0.19087  
160 ->169 0.32782  
162 ->169 0.49404  
163 ->169 -0.16809  
165 ->170 0.20229  
168 ->172 -0.10235

**TD-DFT of PTZ 4 in DCM solvent.** Calculation method: B3LYP/6-31G(d,p)

Excitation energies and oscillator strengths:

Excited State 1: Singlet-A 3.1114 eV 398.48 nm f=2.3897  
<S\*\*2>=0.000  
124 ->125 0.70011

This state for optimization and/or second-order correction.

Total Energy, E(TD-HF/TD-KS) = -1798.31950823

Copying the excited state density for this state as the 1-particle RhoCI density.

Excited State 2: Singlet-A 3.7183 eV 333.44 nm f=0.0456  
<S\*\*2>=0.000  
123 ->126 0.14996  
124 ->126 0.67563

Excited State 3: Singlet-A 3.7907 eV 327.08 nm f=0.1243  
<S\*\*2>=0.000  
123 ->125 0.69189

Excited State 4: Singlet-A 4.0814 eV 303.78 nm f=0.0352  
<S\*\*2>=0.000  
124 ->127 0.67080  
124 ->128 0.10187

Excited State 5: Singlet-A 4.3502 eV 285.01 nm f=0.0222  
<S\*\*2>=0.000  
122 ->126 0.12085  
123 ->126 0.57154  
124 ->126 -0.12043  
124 ->127 -0.11186  
124 ->128 0.32686

Excited State 6: Singlet-A 4.3909 eV 282.37 nm f=0.0044  
<S\*\*2>=0.000  
123 ->126 -0.32937  
123 ->128 0.15729  
124 ->126 0.12270  
124 ->128 0.55296

Excited State 7: Singlet-A 4.3978 eV 281.92 nm f=0.0000  
<S\*\*2>=0.000  
120 ->125 -0.45195  
123 ->130 -0.12385  
124 ->130 0.51407

Excited State 8: Singlet-A 4.4880 eV 276.26 nm f=0.0360  
<S\*\*2>=0.000  
122 ->125 0.66430  
124 ->129 -0.16278



Excited State 9: Singlet-A 4.5336 eV 273.48 nm f=0.0001  
<S\*\*2>=0.000  
118 ->125 0.67046  
118 ->127 0.16324

Excited State 10: Singlet-A 4.5558 eV 272.15 nm f=0.0023  
<S\*\*2>=0.000  
121 ->125 0.57467  
121 ->127 0.14222  
123 ->131 -0.18634  
124 ->131 0.31599

**TD-DFT of PTZ 5 in DCM solvent.** Calculation method: CAM-B3LYP/6-31G(d,p)

Excitation energies and oscillator strengths:

Excited State 1: Singlet-A 3.0709 eV 403.74 nm f=0.9274  
<S\*\*2>=0.000  
153 ->157 -0.18660  
155 ->157 0.21405  
155 ->158 0.15291  
156 ->157 0.60913

This state for optimization and/or second-order correction.

Total Energy, E(TD-HF/TD-KS) = -2244.91533187

Copying the excited state density for this state as the 1-particle RhoCI density.

Excited State 2: Singlet-A 3.1813 eV 389.73 nm f=0.5401  
<S\*\*2>=0.000  
151 ->157 0.13725  
152 ->157 -0.12080  
155 ->157 0.59898  
155 ->158 0.10217  
156 ->157 -0.20616  
156 ->158 0.17665

Excited State 3: Singlet-A 3.7367 eV 331.80 nm f=0.2581  
<S\*\*2>=0.000

|           |          |
|-----------|----------|
| 153 ->158 | -0.19859 |
| 155 ->157 | -0.18536 |
| 155 ->158 | 0.33978  |
| 155 ->160 | -0.10452 |
| 156 ->158 | 0.52123  |

Excited State 4: Singlet-A 3.7762 eV 328.33 nm f=0.5413  
<S\*\*2>=0.000

|           |          |
|-----------|----------|
| 151 ->158 | 0.10707  |
| 152 ->158 | -0.10876 |
| 153 ->157 | 0.18100  |
| 155 ->158 | 0.51730  |
| 156 ->157 | -0.13009 |
| 156 ->158 | -0.32960 |
| 156 ->160 | -0.13745 |

Excited State 5: Singlet-A 4.1645 eV 297.72 nm f=0.0156  
<S\*\*2>=0.000

|           |          |
|-----------|----------|
| 150 ->157 | 0.50795  |
| 150 ->158 | -0.19233 |
| 151 ->157 | 0.36679  |
| 151 ->158 | -0.12430 |
| 156 ->162 | 0.10069  |

Excited State 6: Singlet-A 4.3216 eV 286.90 nm f=0.0363  
<S\*\*2>=0.000

|           |          |
|-----------|----------|
| 148 ->157 | -0.29297 |
| 148 ->158 | -0.19935 |
| 152 ->157 | 0.22744  |
| 152 ->158 | 0.15322  |
| 153 ->157 | 0.20562  |
| 155 ->159 | 0.40416  |
| 156 ->159 | 0.16360  |

Excited State 7: Singlet-A 4.4144 eV 280.86 nm f=0.1381  
<S\*\*2>=0.000

|           |          |
|-----------|----------|
| 147 ->157 | -0.22136 |
| 152 ->157 | -0.13997 |
| 153 ->157 | 0.53940  |
| 155 ->158 | -0.11664 |

155 ->159 -0.16646  
156 ->157 0.18754

Excited State 8: Singlet-A 4.5606 eV 271.86 nm f=0.0172  
<S\*\*2>=0.000

149 ->157 0.42133  
149 ->158 -0.32931  
149 ->160 -0.28321  
150 ->157 0.12112  
151 ->157 -0.11340  
152 ->157 0.18722  
155 ->159 -0.13193

Excited State 9: Singlet-A 4.5848 eV 270.42 nm f=0.0884  
<S\*\*2>=0.000

145 ->157 -0.14548  
148 ->157 -0.10223  
149 ->157 -0.22703  
149 ->158 0.16848  
149 ->160 0.14625  
150 ->157 0.18969  
151 ->157 -0.17840  
152 ->157 0.33233  
153 ->158 0.14977  
155 ->157 0.11557  
155 ->159 -0.28799  
156 ->159 -0.12555

Excited State 10: Singlet-A 4.7739 eV 259.71 nm f=0.0296  
<S\*\*2>=0.000

145 ->157 -0.10239  
148 ->157 0.43580  
148 ->158 0.11777  
150 ->157 0.11142  
151 ->157 -0.21472  
153 ->158 0.14362  
155 ->159 0.28684  
156 ->160 0.18993

**TD-DFT of PTZ 6 in gas phase.** Calculation method: B3LYP/6-31G(d,p)

Excitation energies and oscillator strengths:

Excited State 1: Singlet-A 2.0382 eV 608.31 nm f=0.1142  
<S\*\*2>=0.000

175 ->177 0.64862  
176 ->177 -0.25827

This state for optimization and/or second-order correction.

Total Energy, E(TD-HF/TD-KS) = -2476.97227296

Copying the excited state density for this state as the 1-particle RhoCI density.

Excited State 2: Singlet-A 2.0946 eV 591.91 nm f=0.4312  
<S\*\*2>=0.000

174 ->177 0.21628  
175 ->177 0.26238  
176 ->177 0.60116  
176 ->178 0.15554

Excited State 3: Singlet-A 2.5609 eV 484.14 nm f=0.1125  
<S\*\*2>=0.000

174 ->177 -0.48186  
175 ->178 0.14473  
176 ->178 0.48205

Excited State 4: Singlet-A 2.8123 eV 440.86 nm f=0.6184  
<S\*\*2>=0.000

172 ->177 0.13580  
174 ->177 0.38511  
175 ->178 -0.20806  
176 ->177 -0.22208  
176 ->178 0.47448

Excited State 5: Singlet-A 3.0633 eV 404.74 nm f=0.9158  
<S\*\*2>=0.000

172 ->177 -0.13967  
174 ->177 0.19778  
174 ->178 0.15720  
175 ->178 0.61985  
176 ->177 -0.14098

Excited State 6: Singlet-A 3.1944 eV 388.13 nm f=0.0002  
<S\*\*2>=0.000  
173 ->177 0.70618

Excited State 7: Singlet-A 3.2055 eV 386.79 nm f=0.1031  
<S\*\*2>=0.000  
172 ->177 0.62730  
174 ->178 -0.19402  
175 ->178 0.19581

Excited State 8: Singlet-A 3.2993 eV 375.79 nm f=0.0048  
<S\*\*2>=0.000  
168 ->177 0.18303  
170 ->177 0.51022  
171 ->177 -0.35645  
174 ->178 0.24100

Excited State 9: Singlet-A 3.3125 eV 374.29 nm f=0.0051  
<S\*\*2>=0.000  
168 ->177 -0.27308  
170 ->177 0.47623  
171 ->177 0.37303  
174 ->178 -0.22327

Excited State 10: Singlet-A 3.4175 eV 362.79 nm f=0.0721  
<S\*\*2>=0.000  
167 ->177 0.14129  
171 ->177 0.29895  
172 ->177 0.19077  
174 ->177 -0.12591  
174 ->178 0.53730  
176 ->181 0.10326
